# Supplementary material for: Immune pathways and TP53 missense mutations are associated with longer survival in canine osteosarcoma
Source: PubMed Central journal article supplement (PMC8505454; doi:10.1038/s42003-021-02683-0), 2021-10-11
Supplement: 42003_2021_2683_MOESM2_ESM.pdf [file 42003_2021_2683_MOESM2_ESM.pdf]

# **Immune pathways and *TP53* missense mutations are associated with longer survival in canine osteosarcoma**

Sunetra Das, Rupa Idate, Daniel P. Regan, Jared S. Fowles, Susan E. Lana, Douglas H. Thamm, Daniel L. Gustafson, Dawn L. Duval

## **Supplementary Information**

Supplementary Tables 1-4

Supplementary Figures 1-16

Supplementary References

Supplementary Note 1

**Supplementary Table 1.** General description on the normal bone samples used for this study for microarray analysis.

| Sample ID | Sex    | Breed               | Date of birth | Tumor location         | Normal bone location     | Neutered status |
|-----------|--------|---------------------|---------------|------------------------|--------------------------|-----------------|
| N1        | Female | Labrador Retriever  | 6/15/96       | Proximal right tibia   | Proximal right femur     | Yes             |
| N2        | Male   | Mix                 | 9/29/99       | Distal femur           | Distal tibia             | Yes             |
| N3        | Female | Labrador Retriever  | 2/14/00       | Distal left tibia      | Proximal left femur      | Yes             |
| N4        | Female | Canadian Husky, Red | 11/1/01       | Left distal femur      | Distal tibia             | Yes             |
| N5        | Female | Labrador Retriever  | 1/1/00        | Proximal right humerus | Distal right radius/ulna | Yes             |
| N8        | Male   | Mix                 | 9/1/03        | Proximal left humerus  | Distal left radius/ulna  | Yes             |
| N9        | Female | Coonhound           | 5/24/01       | Distal left radius     | Proximal left humerus    | Yes             |
| N10       | Male   | Labrador Retriever  | 3/19/03       | Proximal right humerus | Distal right radius/ulna | Yes             |

**Supplementary Table 2.** The marker genes assigned to immune cell type used in this study. The gene list was derived from Rooney et al. 2015.

| Immune Cell Type/<br>Response | Number of<br>genes in<br>Rooney et al.<br>2015 | Number of genes<br>with expression<br>data in this canine<br>study | Missing<br>Orthologs        | Genes analyzed in this canine study                                                                  |
|-------------------------------|------------------------------------------------|--------------------------------------------------------------------|-----------------------------|------------------------------------------------------------------------------------------------------|
| B cells                       | 10                                             | 9                                                                  | FCRL3                       | CD79B, BTLA, BANK1, CD79A, BLK, RALGPS2, FCRL1, HVCN1, BACH2                                         |
| CD4+ Regulatory T cells       | 7                                              | 5                                                                  | C15orf53, IL32              | FOXP3, IL5, CTLA4, GPR15, IL4                                                                        |
| CD8+ T cells                  | 1                                              | 1                                                                  | na                          | CD8A                                                                                                 |
| Co-inhibition, APC            | 5                                              | 4                                                                  | C10orf54                    | PDCD1LG2, CD274, LGALS9, PVRL3                                                                       |
| Co-inhibition, T cell         | 10                                             | 9                                                                  | C10orf54                    | LAG3, CTLA4, CD274, CD160, BTLA, LAIR1, HAVCR2, CD244, TIGIT                                         |
| Co-stimulation, APC           | 11                                             | 11                                                                 | na                          | ICOSLG, CD70, TNFSF14, CD40, TNFSF9, TNFSF4, TNFSF15, TNFSF18, TNFSF8, SLAMF1, CD58                  |
| Co-stimulation, T cell        | 13                                             | 13                                                                 | na                          | ICOS, CD28, CD27, TNFSF14, CD40LG, TNFRSF9, TNFRSF4, TNFRSF25, TNFRSF18, TNFRSF8, SLAMF1, CD2, CD226 |
| Cytolytic Activity            | 2                                              | 2                                                                  | na                          | GZMA, PRF1                                                                                           |
| Macrophages                   | 10                                             | 8                                                                  | C11orf45, CD68              | FUCA1, MMP9, LGMN, HS3ST2, TM4SF19, CLEC5A, GPNMB, CYBB                                              |
| MHC Class I                   | 3                                              | 2                                                                  | HLA-A                       | B2M, TAP1                                                                                            |
| Neutrophils                   | 10                                             | 8                                                                  | MEGF9, VNN3                 | KDM6B, HSD17B11, EVI2B, MNDA, SELL, NLRP12, PADI4, TRANK1                                            |
| NK cells                      | 2                                              | 1                                                                  | KLRC1                       | KLRF1                                                                                                |
| pDCs                          | 10                                             | 6                                                                  | LILRA4, CLEC4C, PTCRA, GZMB | PLD4, PHEX, IL3RA, IRF8, IRF7, CXCR3                                                                 |
| Type I IFN Response           | 10                                             | 9                                                                  | IFIT3                       | MX1, TNFSF10, RSAD2, IFIT1, IFIT2, IRF7, DDX4, MX2, ISG20                                            |
| Type II IFN Response          | 3                                              | 3                                                                  | na                          | GPR146, SELP, AHR                                                                                    |

**Supplementary Table 3.** Immune genes significantly correlated with cytolytic activity.

| Cell type (Rooney et al 2015) | Corresponding marker gene | Correlation Coefficient | p value | q value |
|-------------------------------|---------------------------|-------------------------|---------|---------|
| Co-stimulation, T cell        | CD2                       | 0.8156                  | <0.0001 | <0.0001 |
| CD8+ T cells                  | CD8A                      | 0.7906                  | <0.0001 | 0.0001  |
| Co-inhibition, T cell         | CD160                     | 0.7862                  | <0.0001 | 0.0001  |
| Macrophages                   | CLEC5A                    | 0.7535                  | <0.0001 | 0.0005  |
| MHC Class I                   | TAP1                      | 0.7313                  | <0.0001 | 0.0010  |
| Type I IFN Response           | ISG20                     | 0.6746                  | 0.0002  | 0.0042  |
| pDCs                          | CXCR3                     | 0.6708                  | 0.0002  | 0.0046  |
| Macrophages                   | CYBB                      | 0.6684                  | 0.0002  | 0.0048  |
| pDCs                          | IRF8                      | 0.6349                  | 0.0005  | 0.0095  |
| Type II IFN Response          | AHR                       | 0.634                   | 0.0005  | 0.0096  |
| Co-inhibition, APC            | PDCD1LG2                  | 0.6203                  | 0.0007  | 0.0122  |
| Neutrophils                   | EVI2B                     | 0.6208                  | 0.0007  | 0.0122  |
| pDCs                          | IRF7                      | 0.6182                  | 0.0008  | 0.0127  |
| Type I IFN Response           | IRF71                     | 0.6182                  | 0.0008  | 0.0127  |
| Co-stimulation, APC           | TNFSF8                    | 0.5943                  | 0.0014  | 0.0192  |
| B cells                       | CD79B                     | 0.5892                  | 0.0015  | 0.0207  |
| Type I IFN Response           | TNFSF10                   | 0.5705                  | 0.0023  | 0.0277  |
| MHC Class I                   | B2M                       | 0.5654                  | 0.0026  | 0.0298  |
| Co-inhibition, T cell         | LAIR1                     | 0.5566                  | 0.0031  | 0.0335  |
| Type I IFN Response           | MX2                       | 0.5362                  | 0.0047  | 0.0431  |
| NK cells                      | KLRF1                     | 0.5359                  | 0.0048  | 0.0433  |

**Supplementary Table 4.** Canine OSA cell line source and metadata.

| <b>Cell Line Name</b> | <b>Source (Reference index)</b> | <b>Breed</b>  | <b>Sex</b>    | <b>Xenograft</b> |
|-----------------------|---------------------------------|---------------|---------------|------------------|
| Abrams                | CSU/UWM(1)                      | Not collected | Not collected | Yes              |
| D-17                  | ATCC(2)                         | Poodle        | Female        | Yes              |
| Gracie                | UWM(3) (E.G. MacEwen)           | Not collected | Not collected | Yes              |
| HMPOS                 | Tokyo(4)                        | Mixed Breed   | Male          | NA               |
| McKinley              | CSU(3)                          | Not collected | Not collected | Yes              |
| Moresco               | UWM(3) (E.G. MacEwen)           | Not collected | Not collected | NA               |
| OS2.4                 | WSU(5) (D. Kochevar)            | Not collected | Not collected | NA               |
| OSA8                  | UM(6) (J. Modiano)              | Not collected | Not collected | NA               |

CSU: Colorado State University.

UWM: University of Wisconsin-Madison.

OSU: The Ohio State University.

Tokyo: University of Tokyo.

WSU: Washington State University.

UM: University of Minnesota.

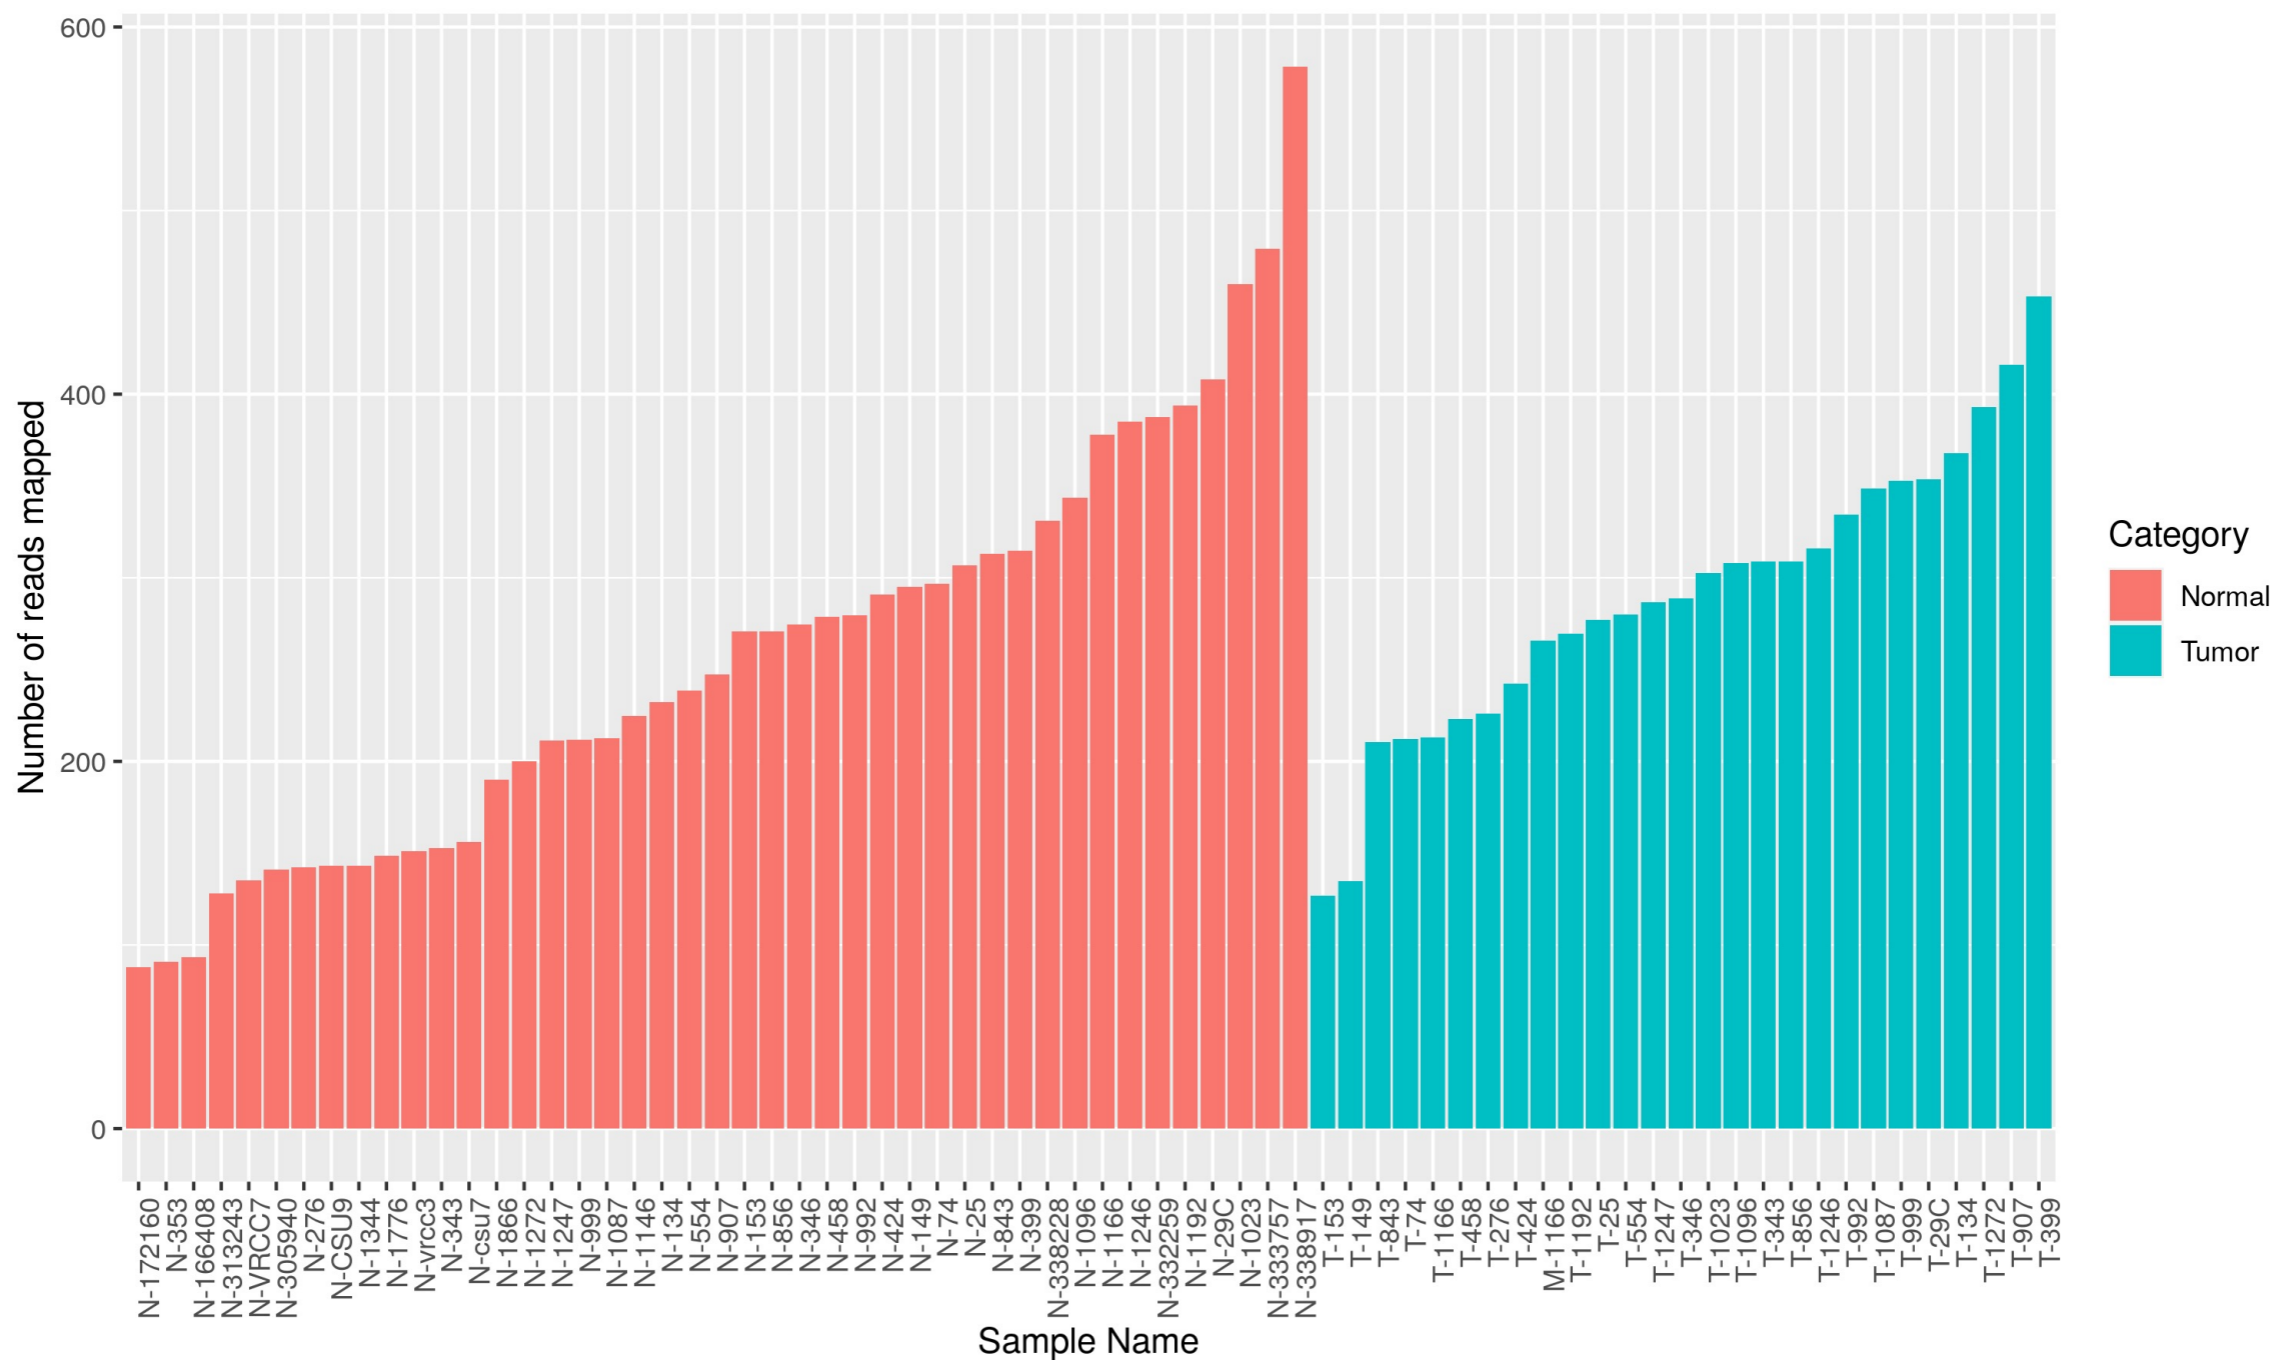

**Supplementary Figure 1.** Depth of sequencing across normal (N-) and tumor samples (T-). Overall, we analyzed whole exome sequence data from 43 normal and 26 osteosarcoma samples. Source data for this plot is included in the Supplementary Data 11.

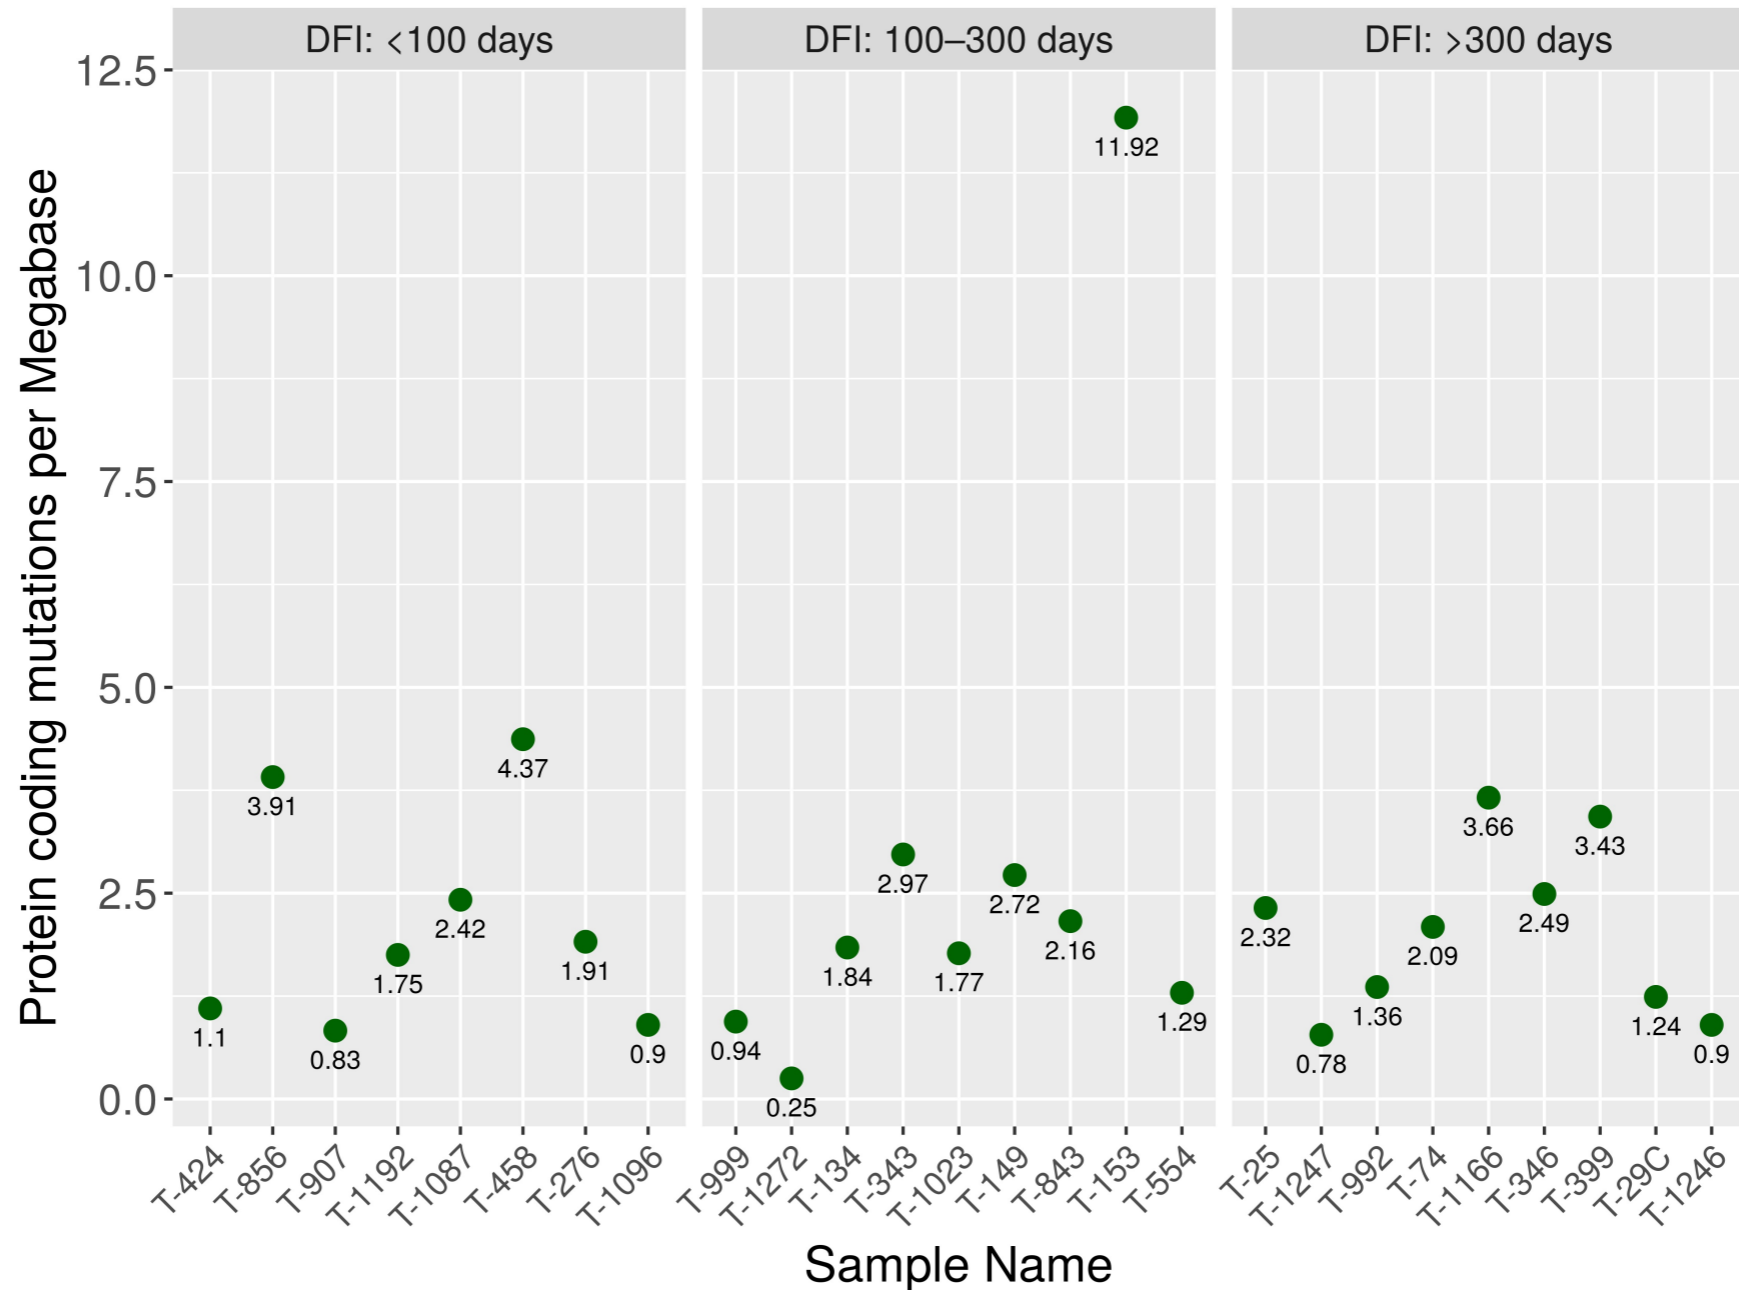

**Supplementary Figure 2.** Mutation burden across 26 canine osteosarcoma samples. Mutation burden is calculated as ratio of short variants over exome capture length in megabases. The samples are sorted in ascending order of disease-free interval (DFI). Source data for this plot is included in the Supplementary Data 11.

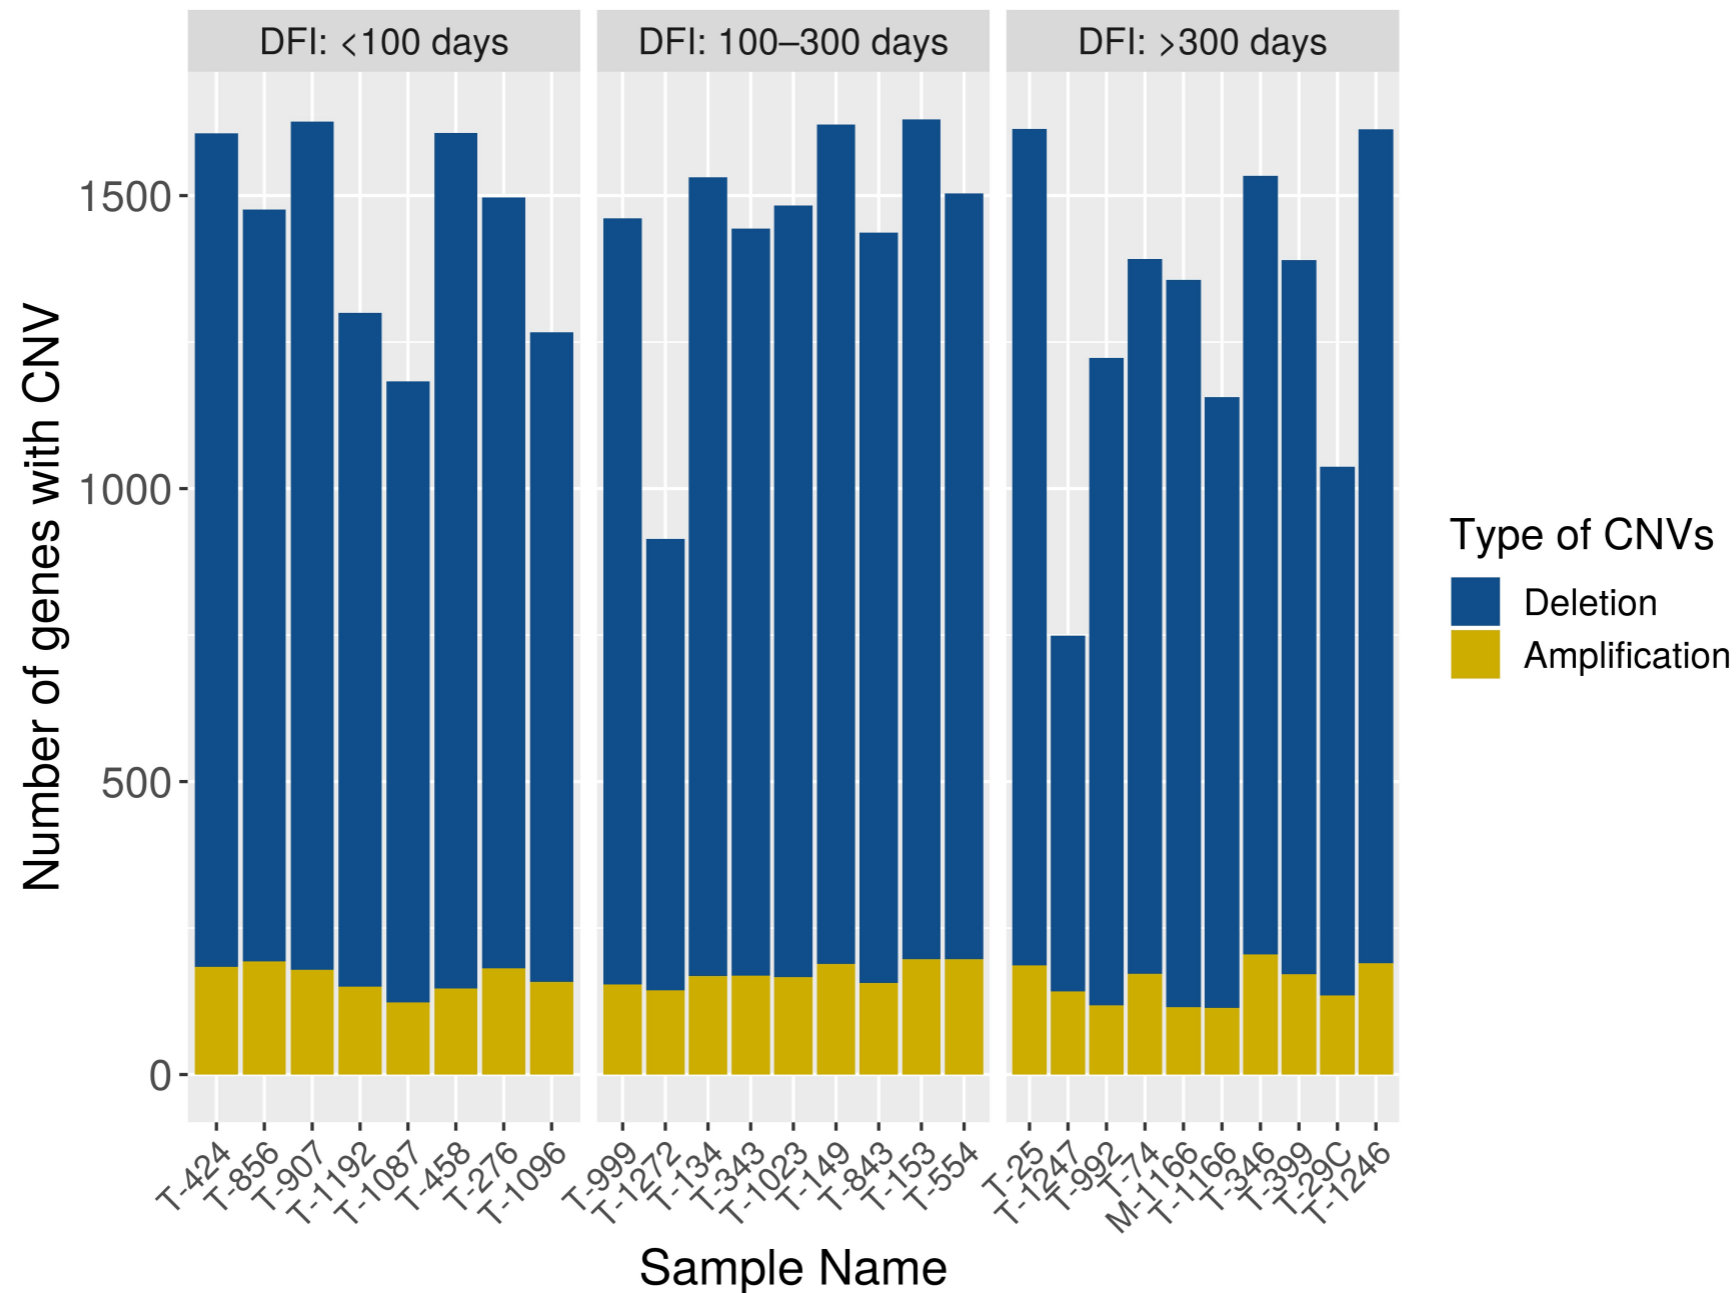

**Supplementary Figure 3.** Total number of copy number variants across 26 samples. Using GISTIC2.0, the significantly recurrent genes ( $q < 0.2$ ) within the copy number variation regions were identified. Source data for this plot is included in the Supplementary Data 11.



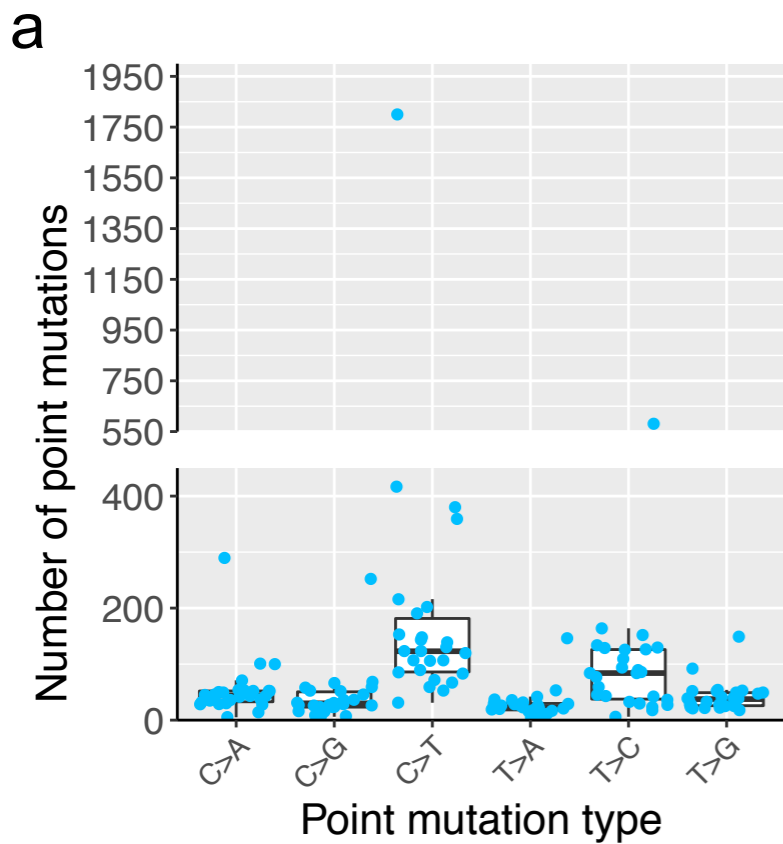

**b**

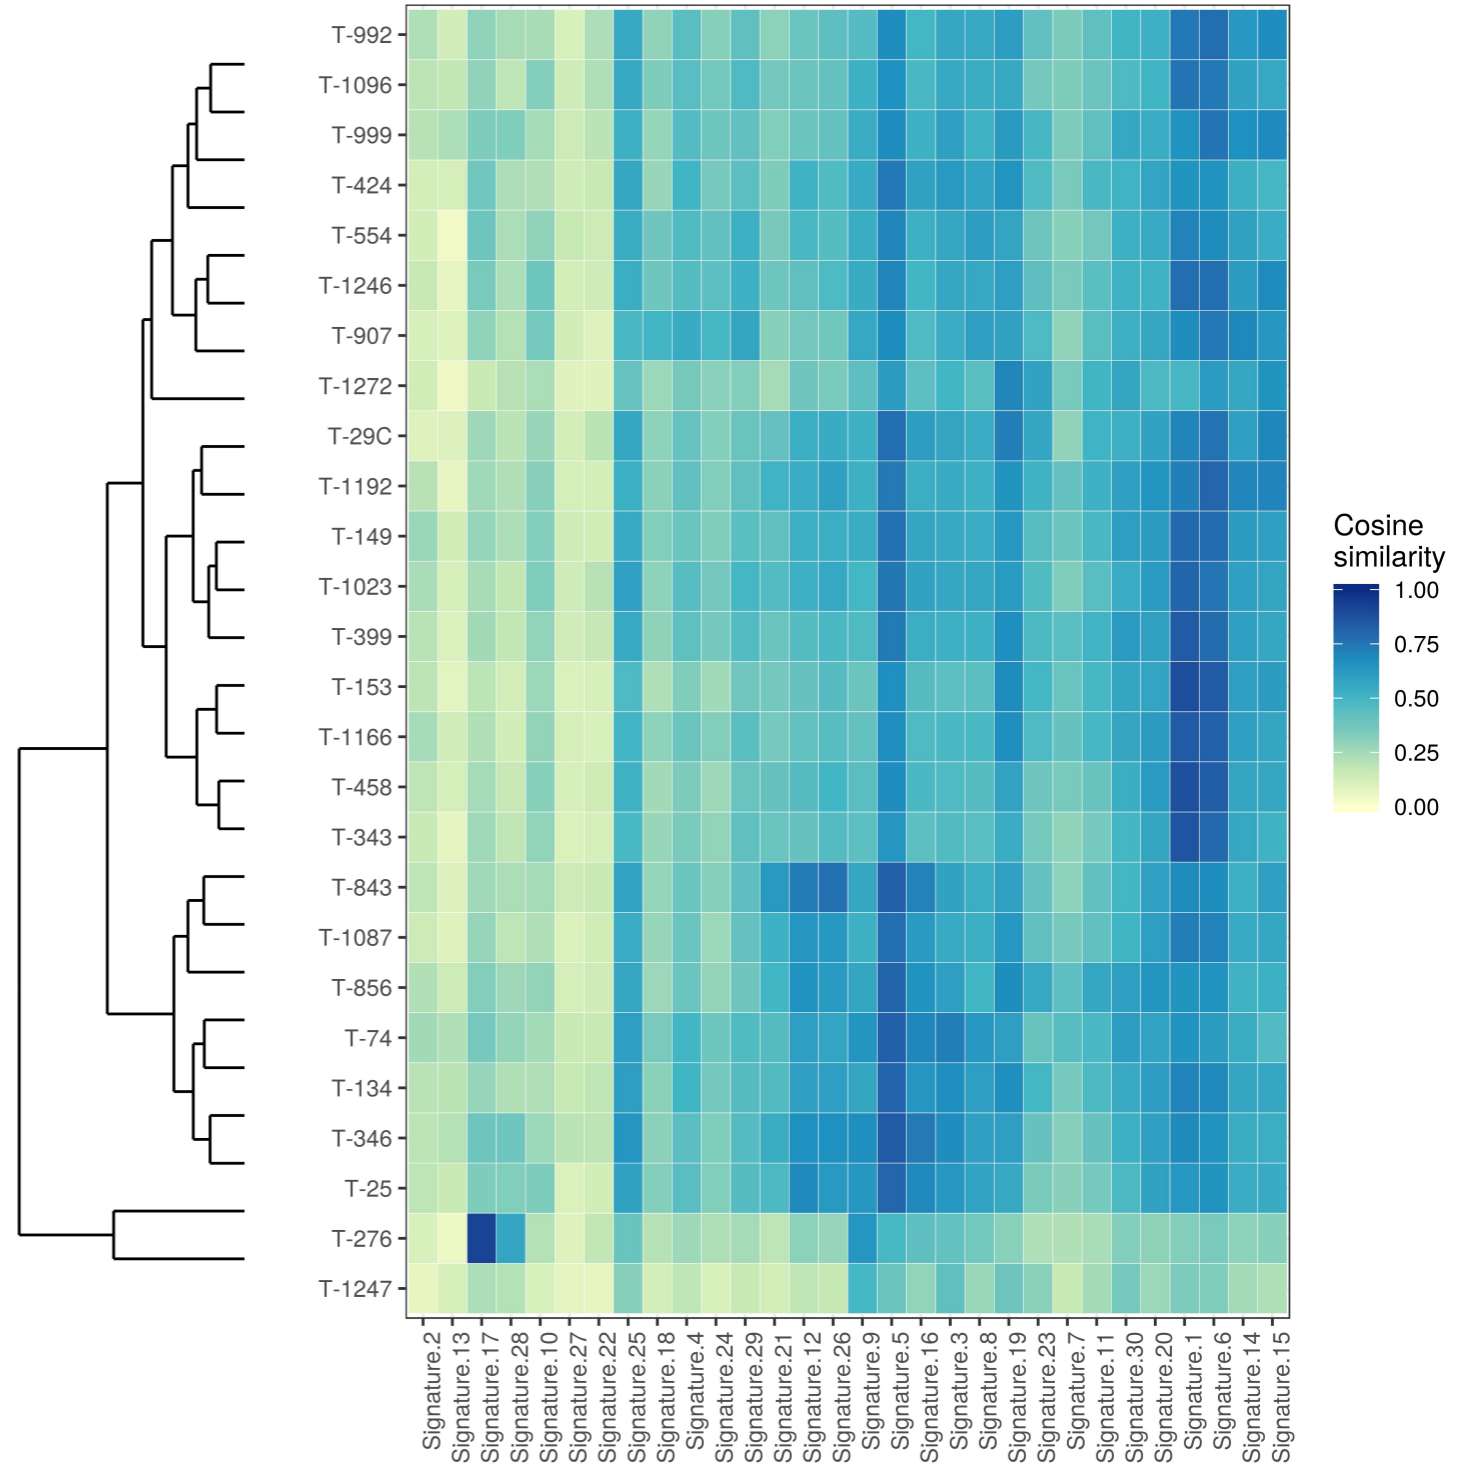

**Supplementary Figure 4.** Mutational signature analysis. S4a. Number of point mutations distributed across six types of single nucleotide substitution. Each point mutation types has values for 26 samples. The horizontal bar in each boxplot is its corresponding median value. S4b. Heatmap of cosine similarities between 30 known COSMIC signatures (hierarchical clustering) and 26 osteosarcoma sample mutational signatures. Source data for these plots are included in the Supplementary Data 11.

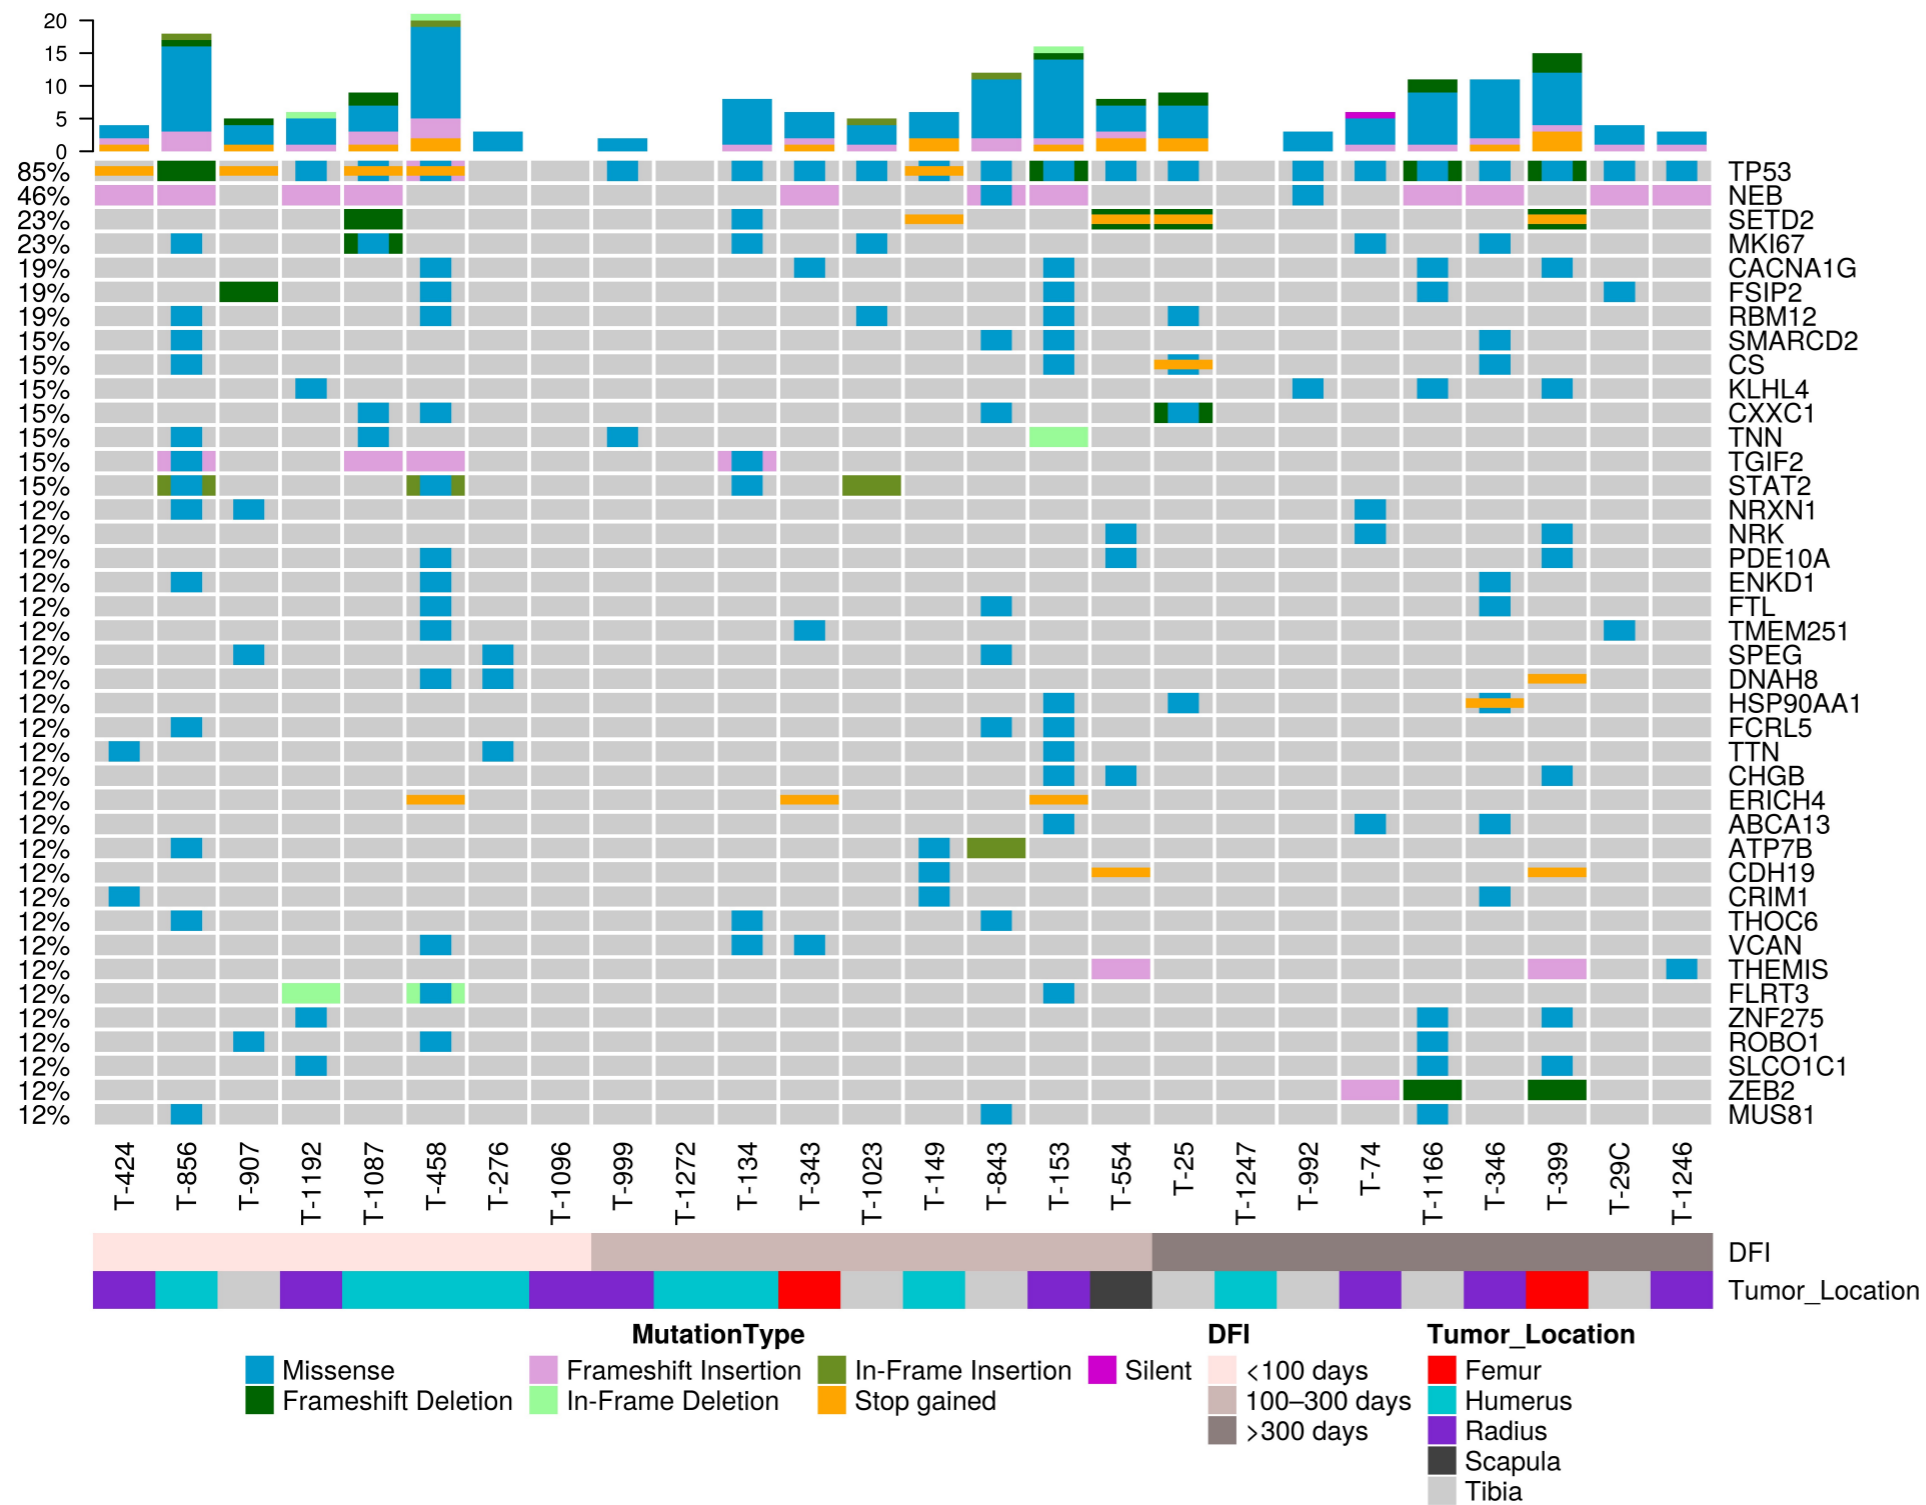

**Supplementary Figure 5.** Oncoplot of top 40 protein coding genes, including cancer census genes. The top histogram represents number of somatic variants in each sample. The bottom two bars represent categorization of samples based on DFI and tumor location.

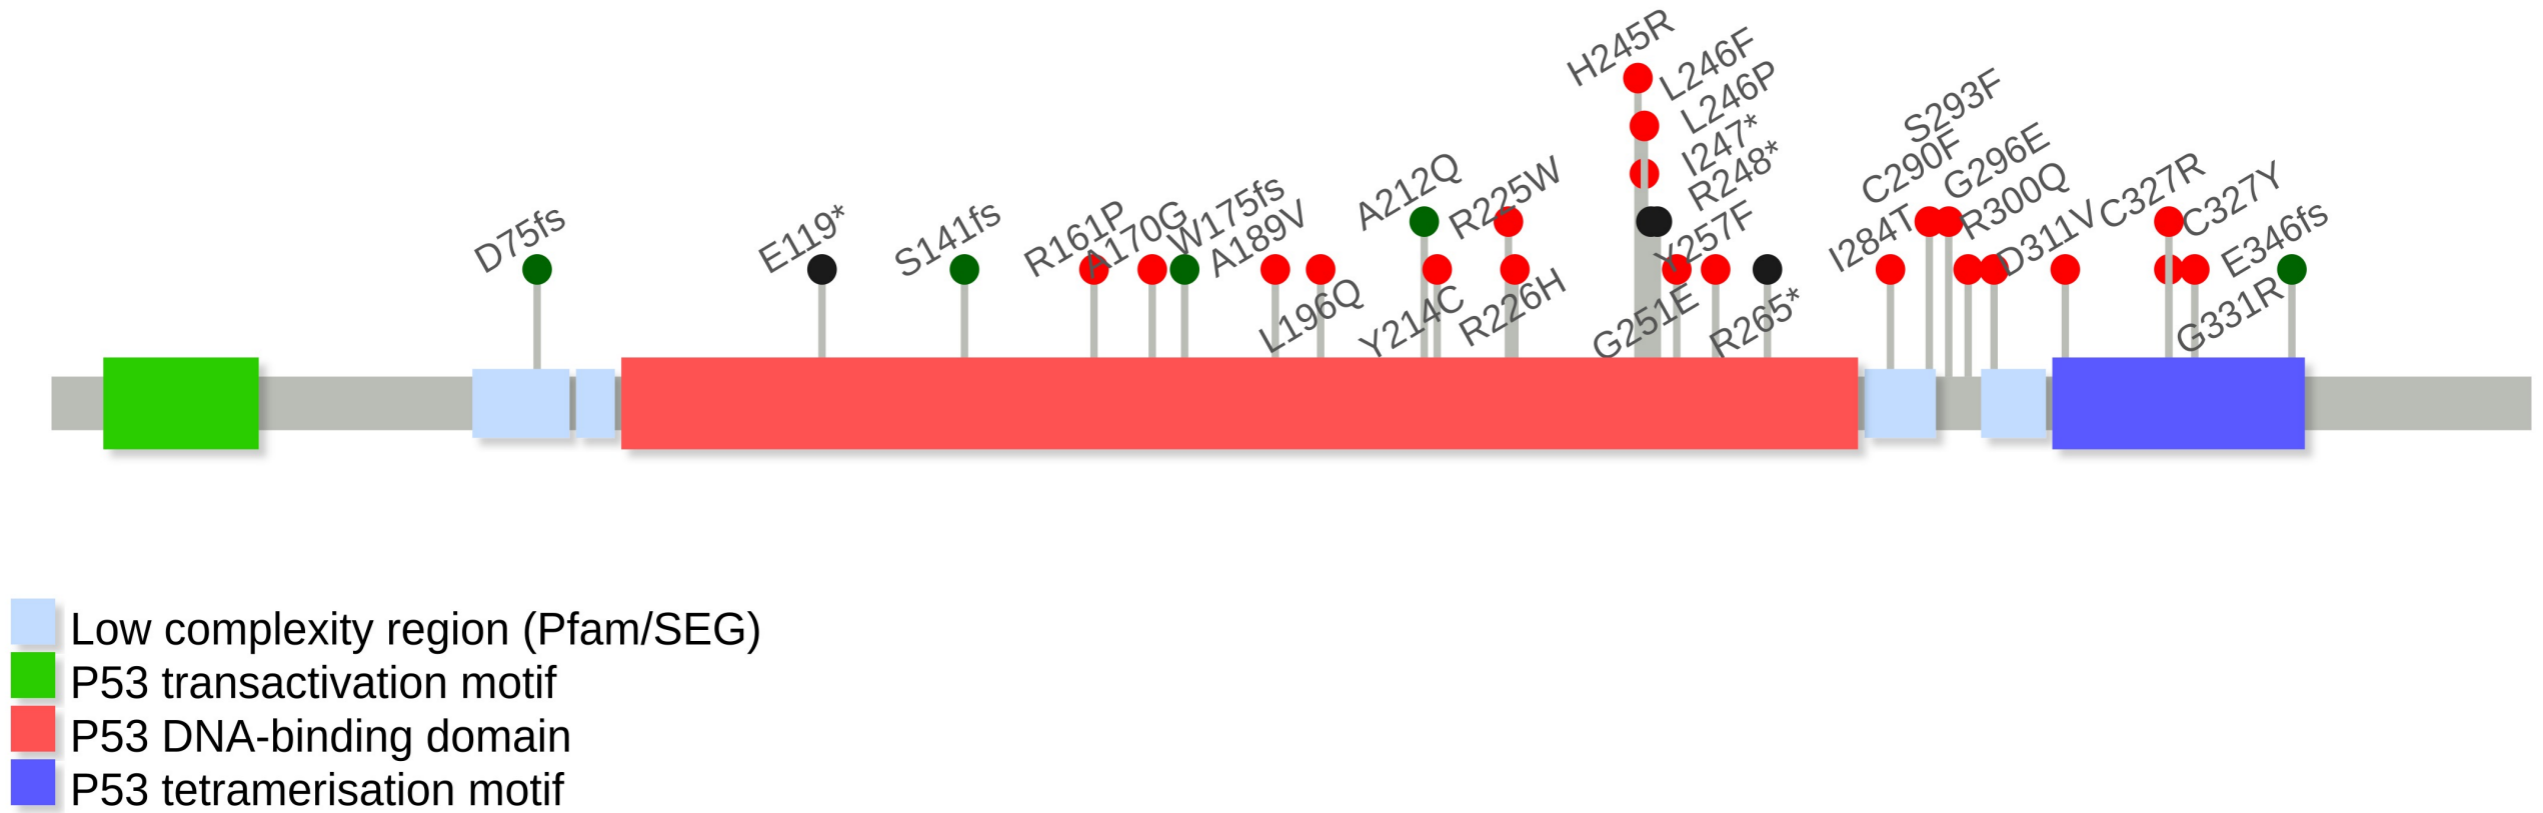

**Supplementary Figure 6.** TP53 mutations (Uniprot ID: A0A5F4DFH1). Lollipop plot of variant location within the TP53 protein domains.

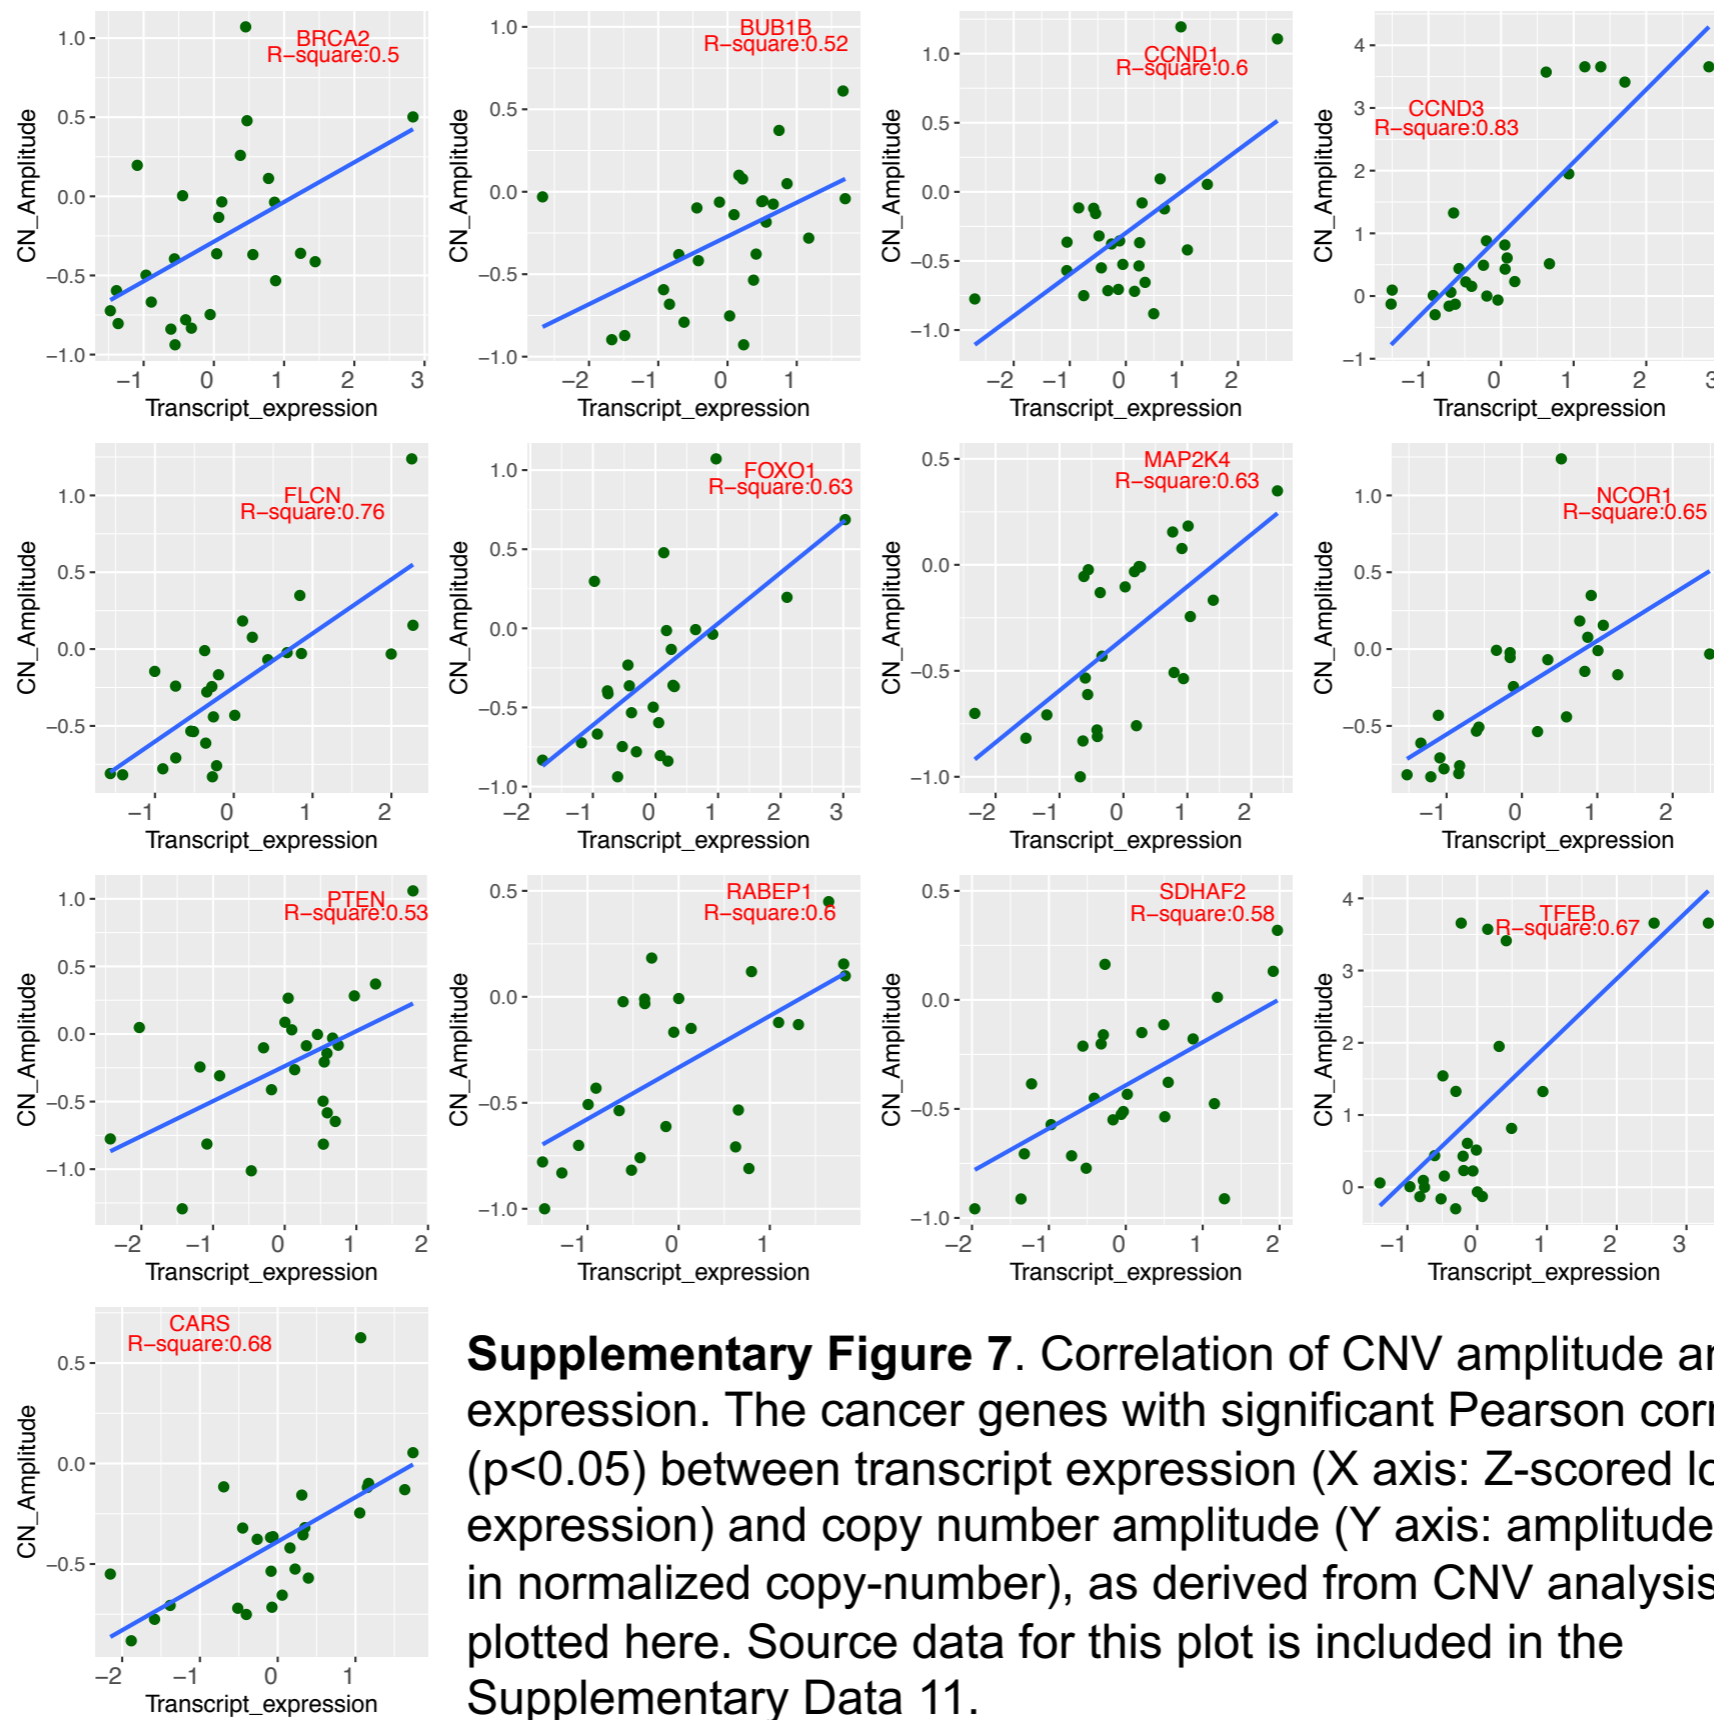

**Supplementary Figure 7.** Correlation of CNV amplitude and gene expression. The cancer genes with significant Pearson correlation ( $p < 0.05$ ) between transcript expression (X axis: Z-scored  $\log_2$  expression) and copy number amplitude (Y axis: amplitude of change in normalized copy-number), as derived from CNV analysis, are plotted here. Source data for this plot is included in the Supplementary Data 11.

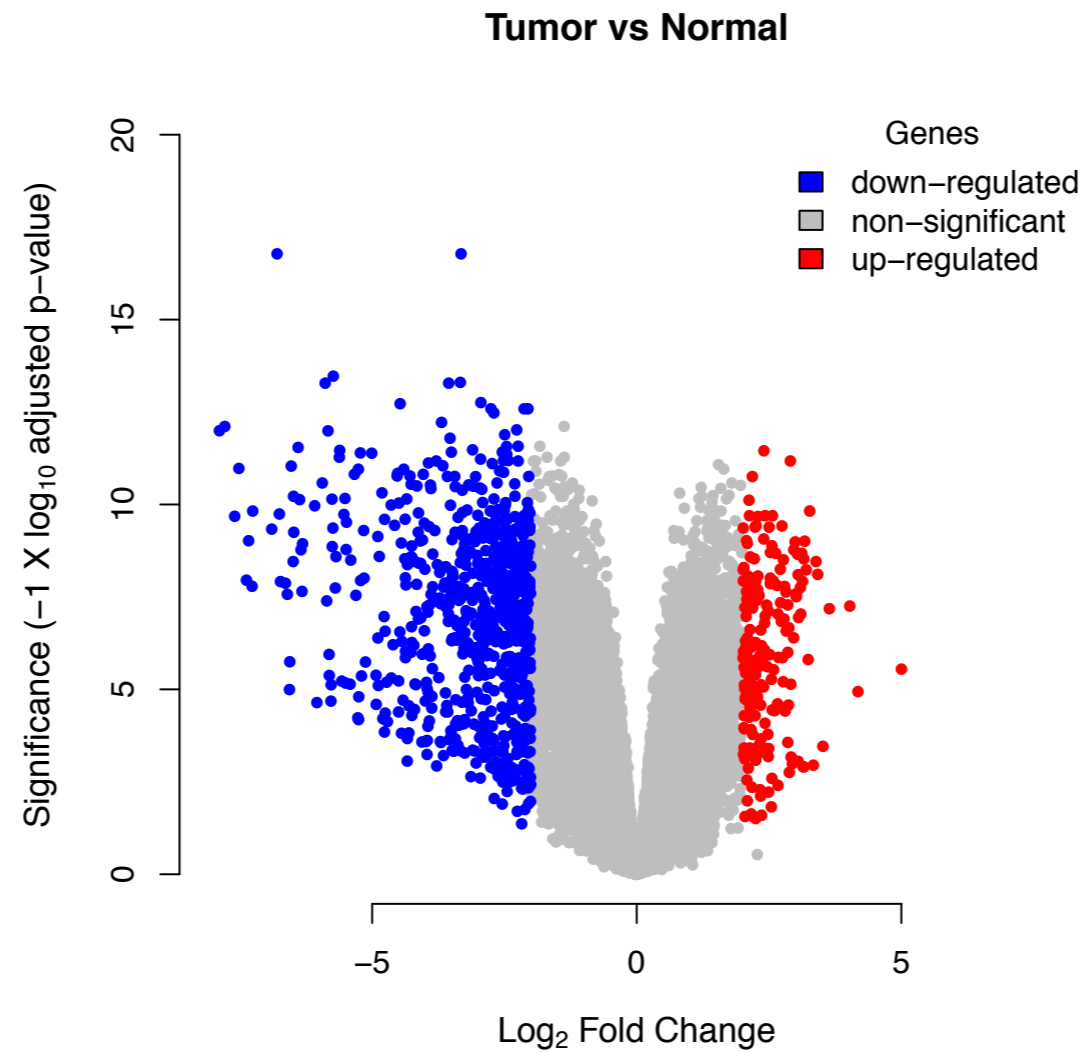

**Supplementary Figure 8.** Volcano plot of differentially expressed genes between osteosarcoma and normal bone samples.

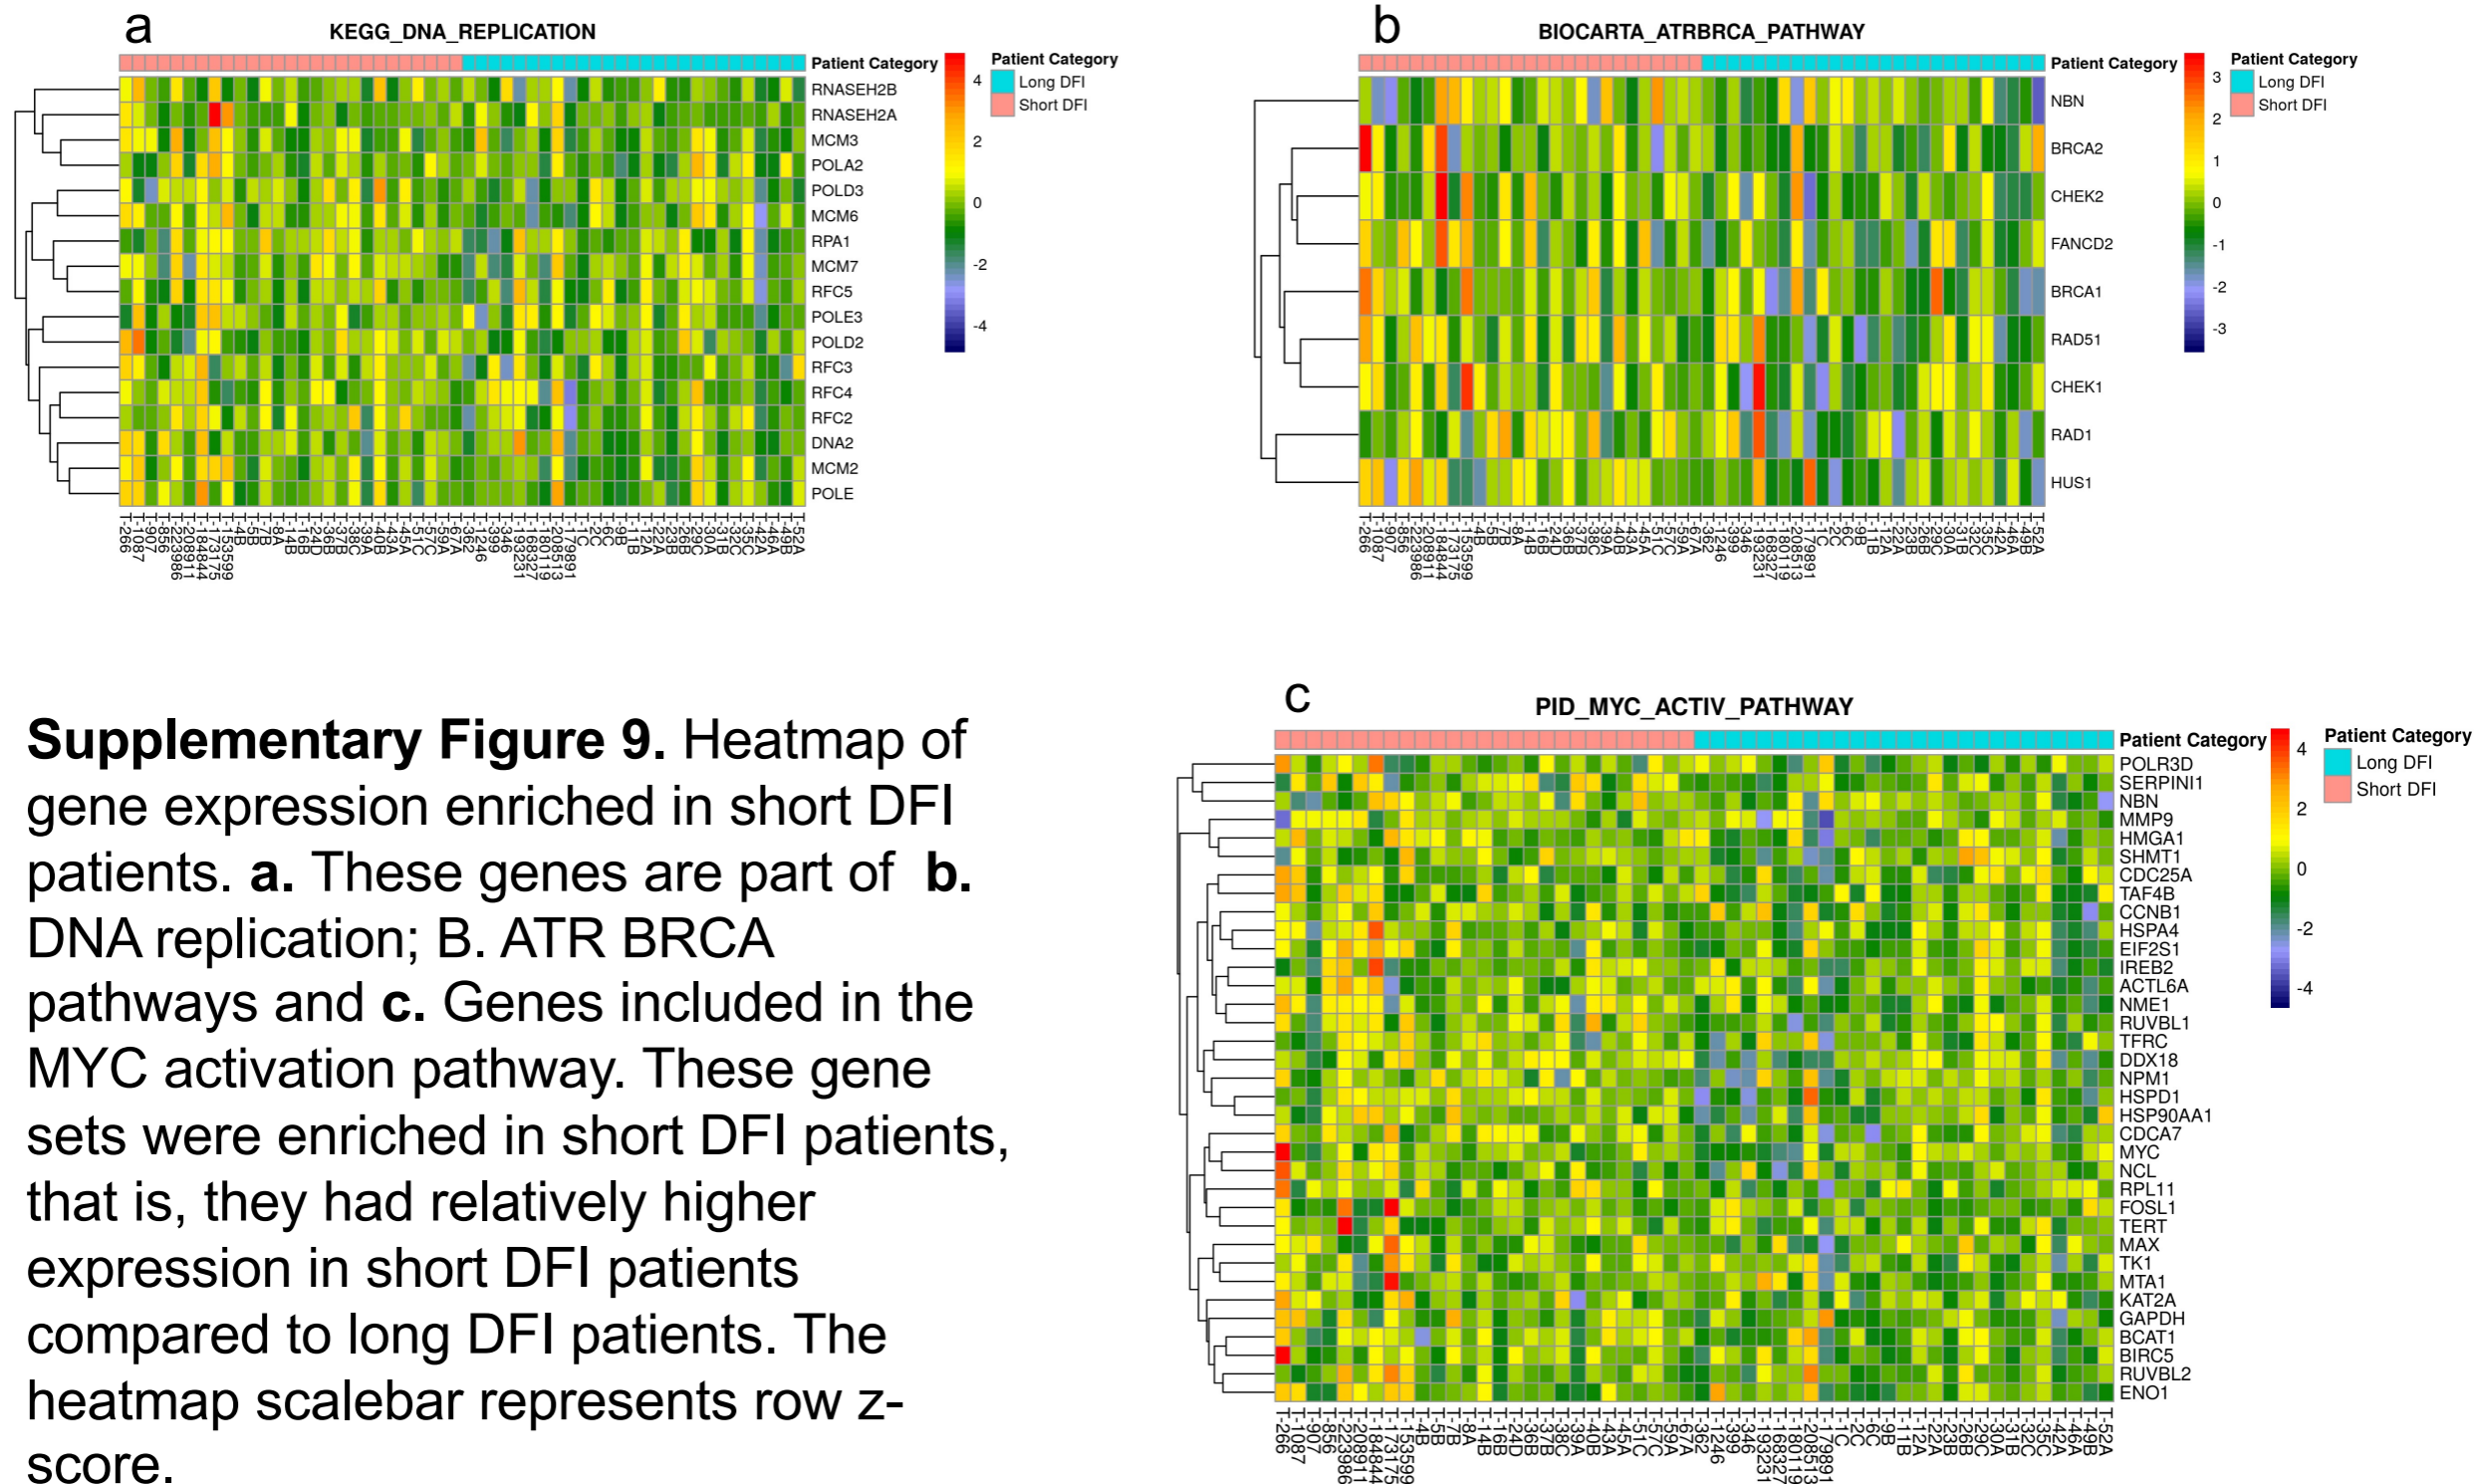

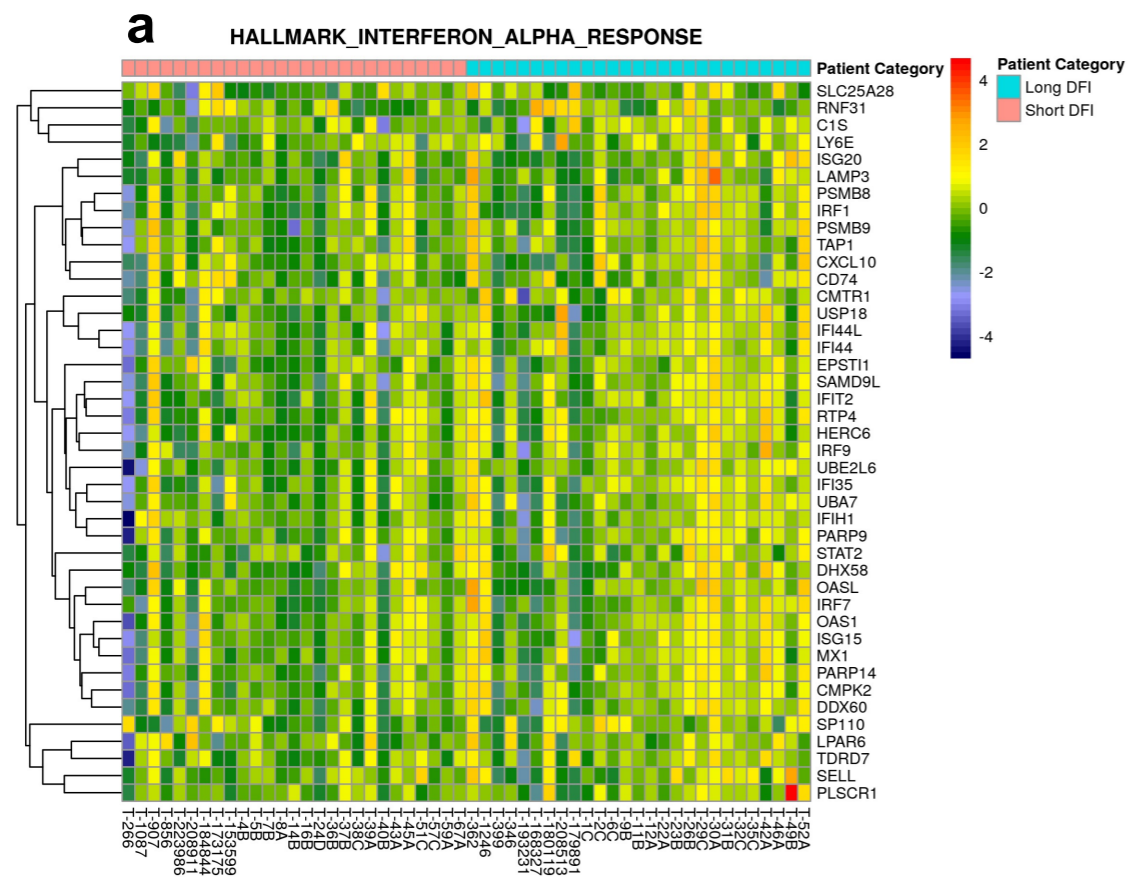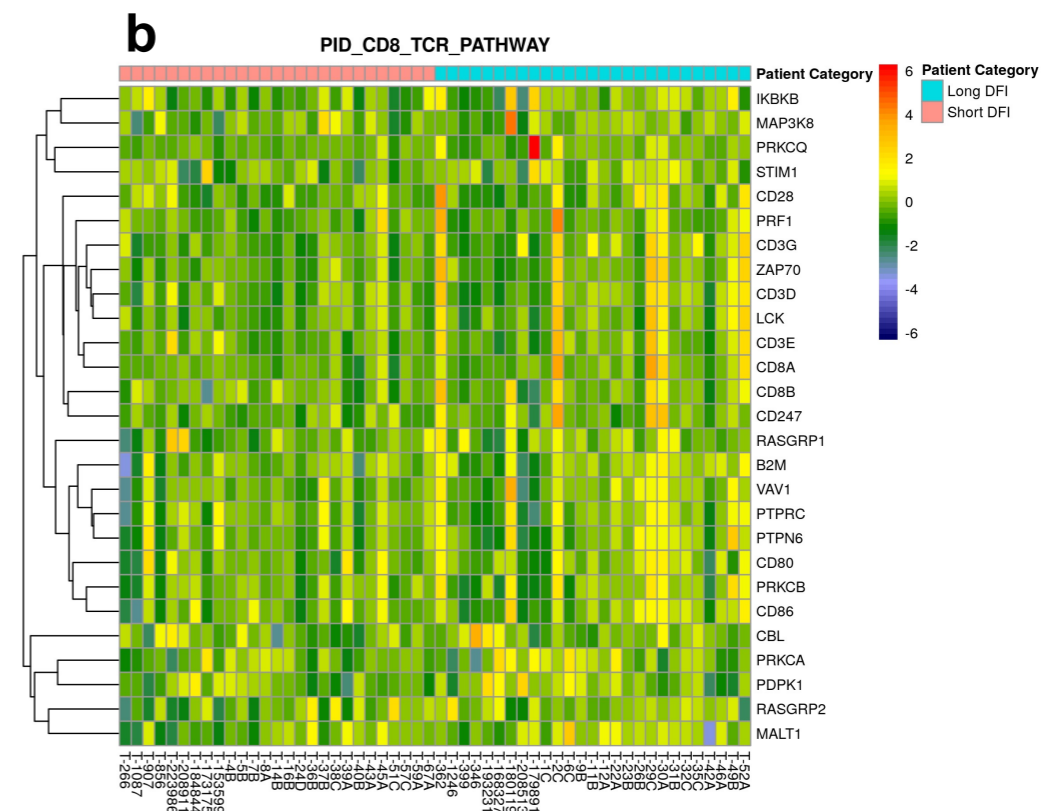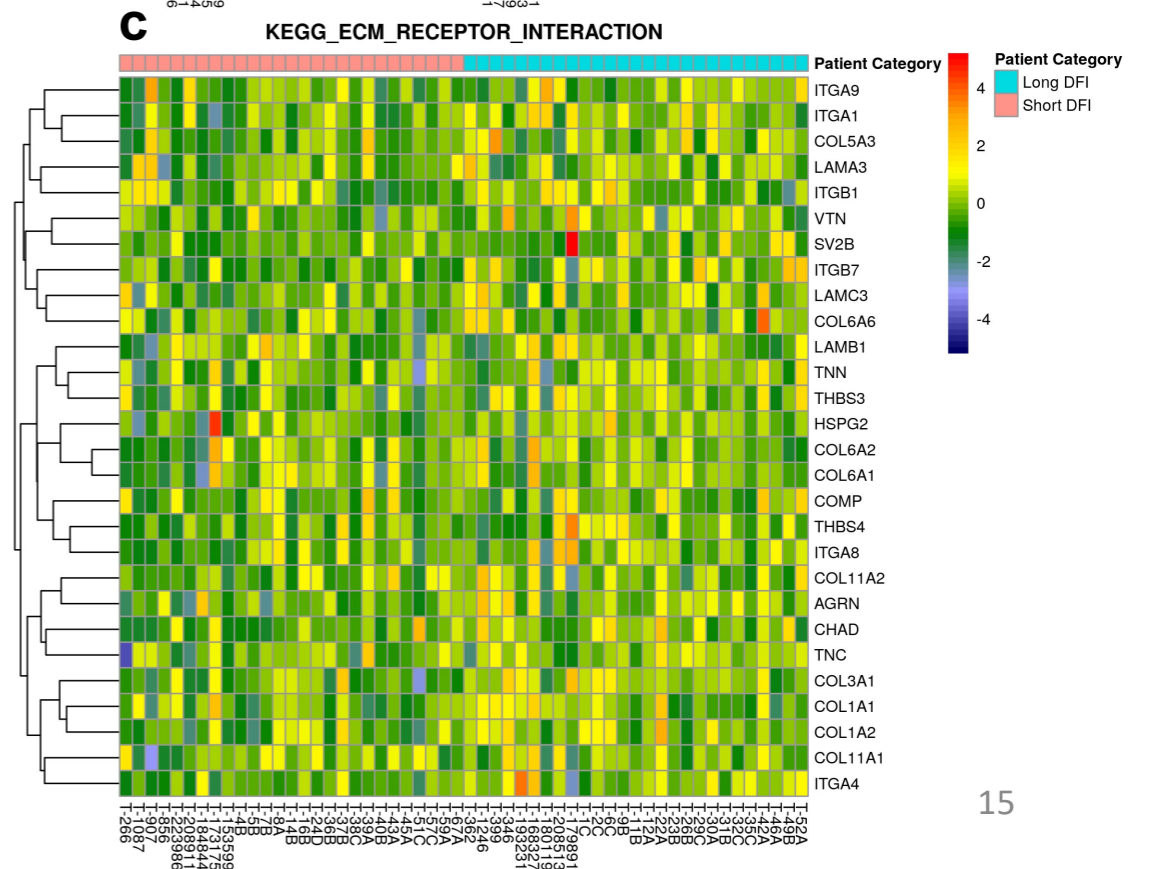

**Supplementary Figure 10.** Heatmap of gene expression enriched in long DFI patients. Figures a and b represent immune response gene sets. The genes in figure c are part of the ECM receptor interaction gene set. All these gene sets have relatively higher expression in long DFI patients when compared to short DFI patients. The heatmap scalebar represents row z-score.

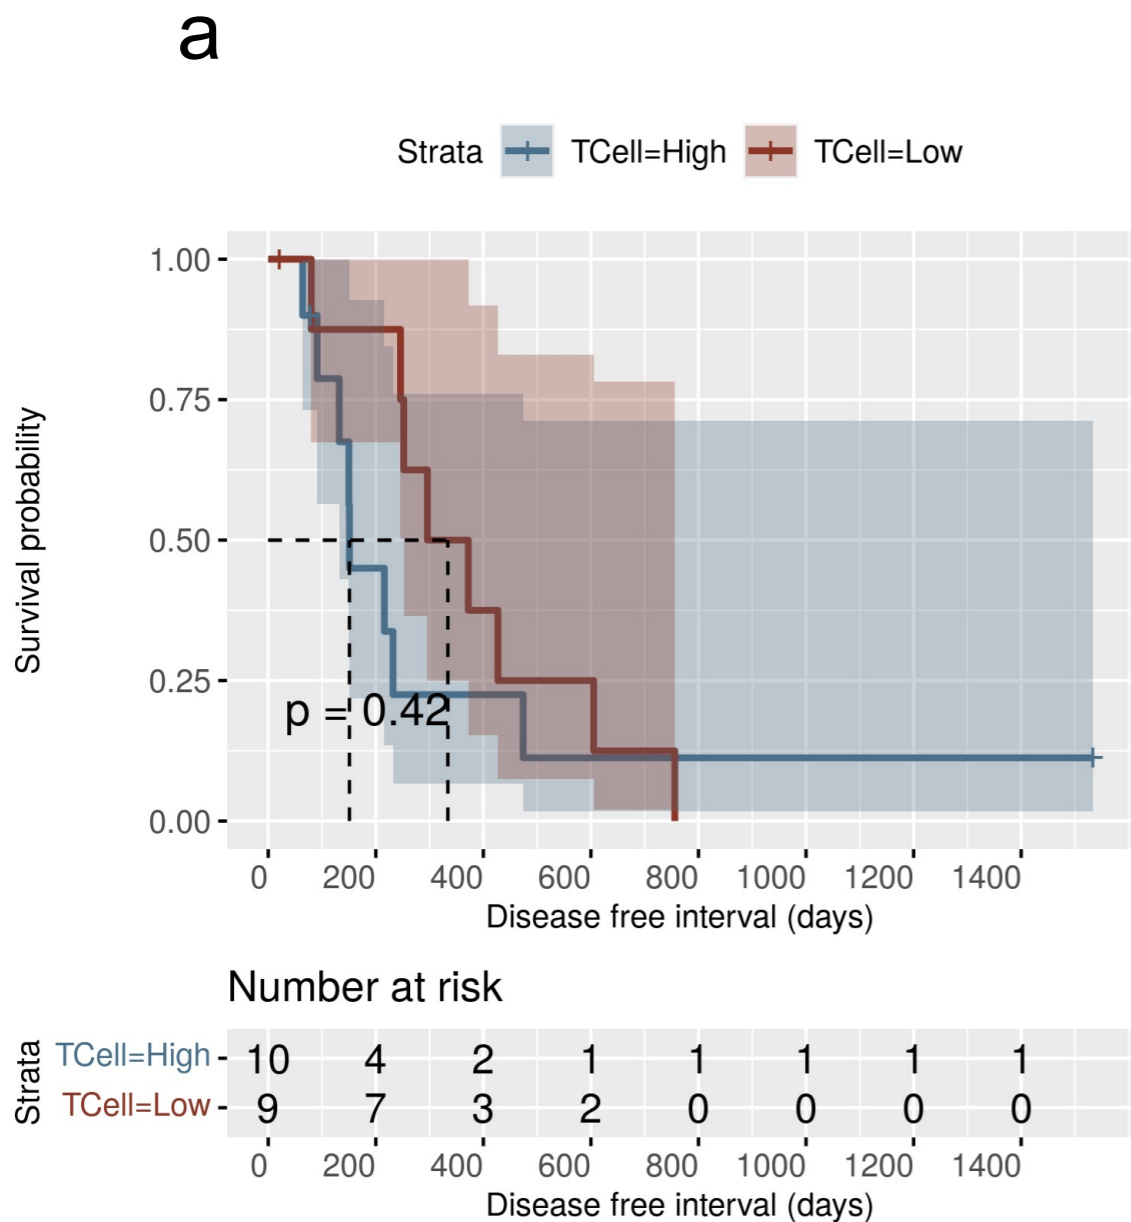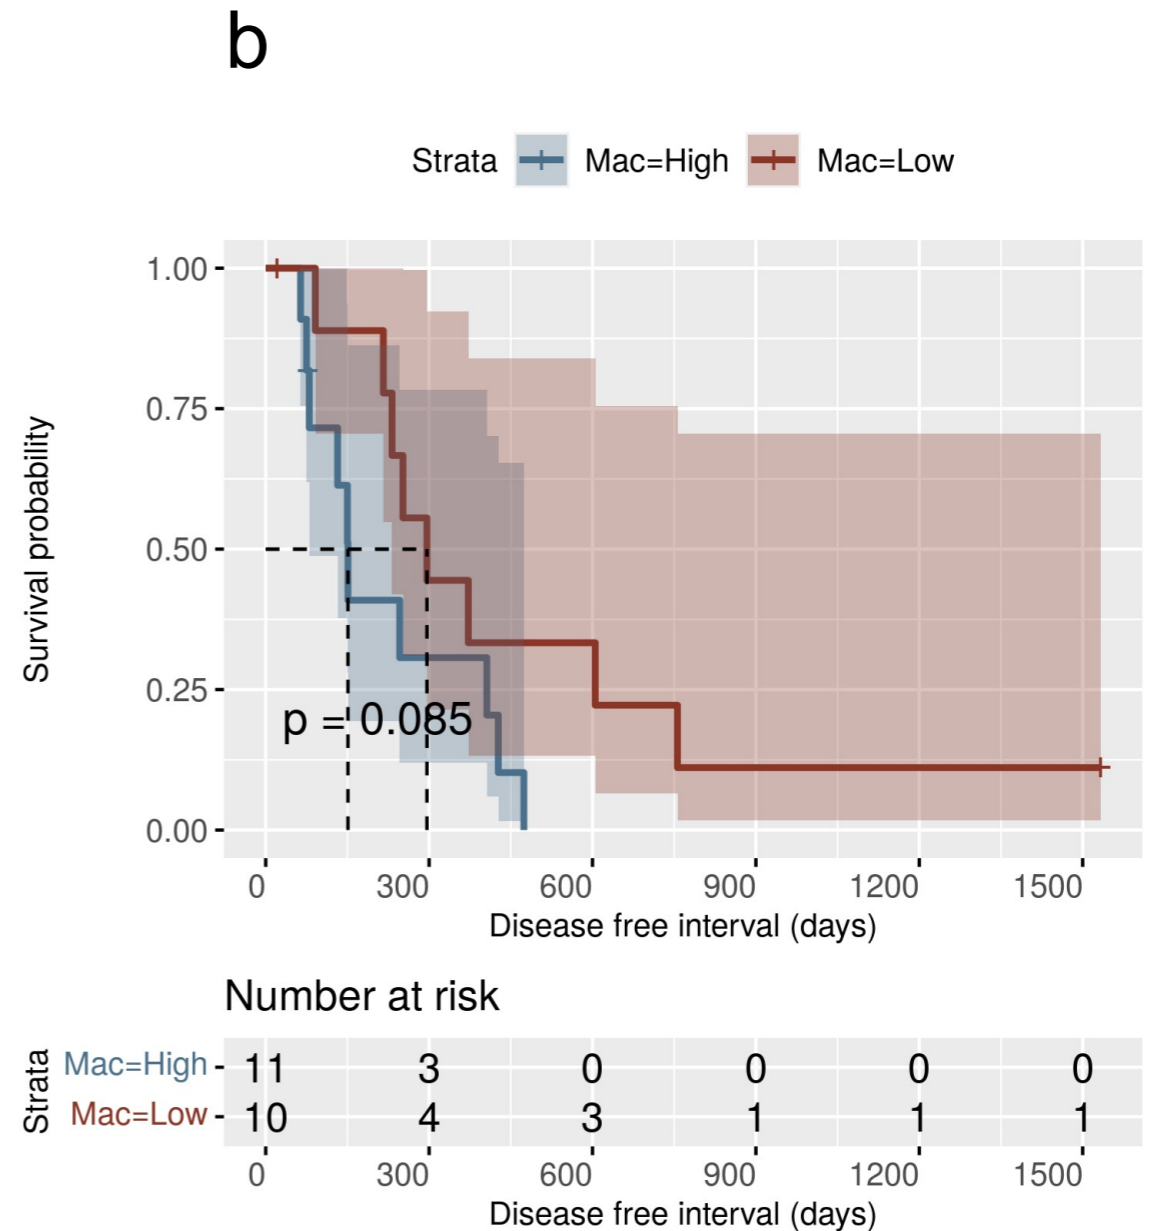

**Supplementary Figure 11.** Kaplan Meier plots. Survival plots in dogs with osteosarcoma were stratified by percent tumor area positive for CD3+ T-cells (a) and MAC387+ Macrophages (b). The red and blue lines represent high and low levels of T-cells or Macrophages (median dichotomized), respectively. The time event analyzed here is disease-free interval (DFI). Source data for these plots are included in the Supplementary Data 11.



**Supplementary Figure 12.** Heatmap of immune gene expression associated with 15 types of immune cell types or responses. The T-cell and macrophage infiltration was quantified via immunohistochemistry. The black colored samples on immune cell infiltration annotation bars represent the samples that were not available for immunohistochemistry analysis.

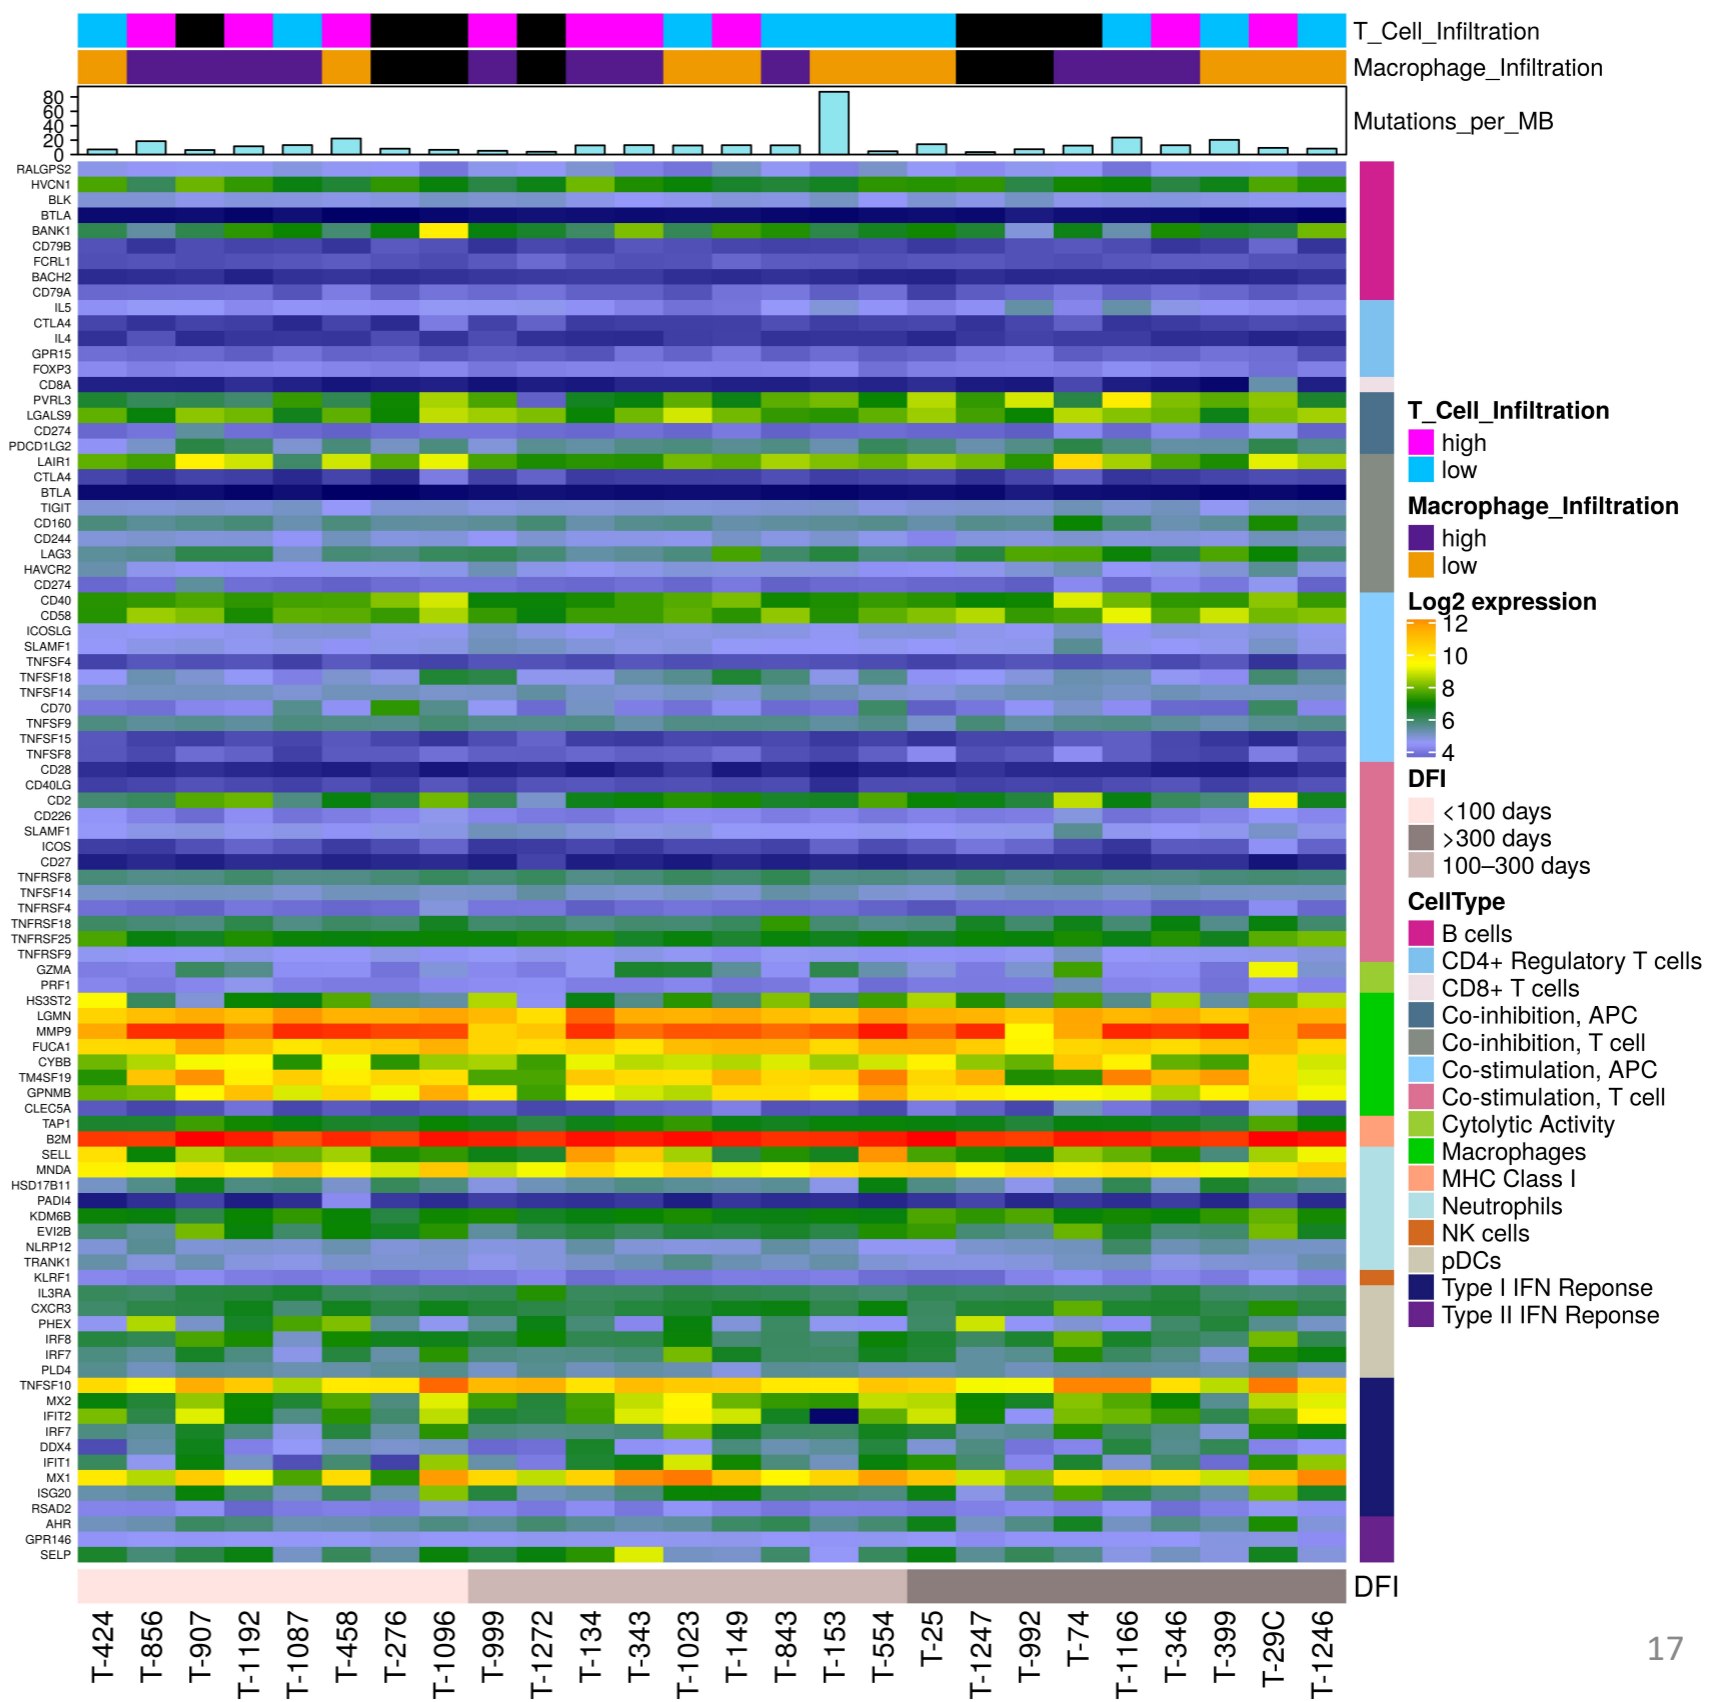

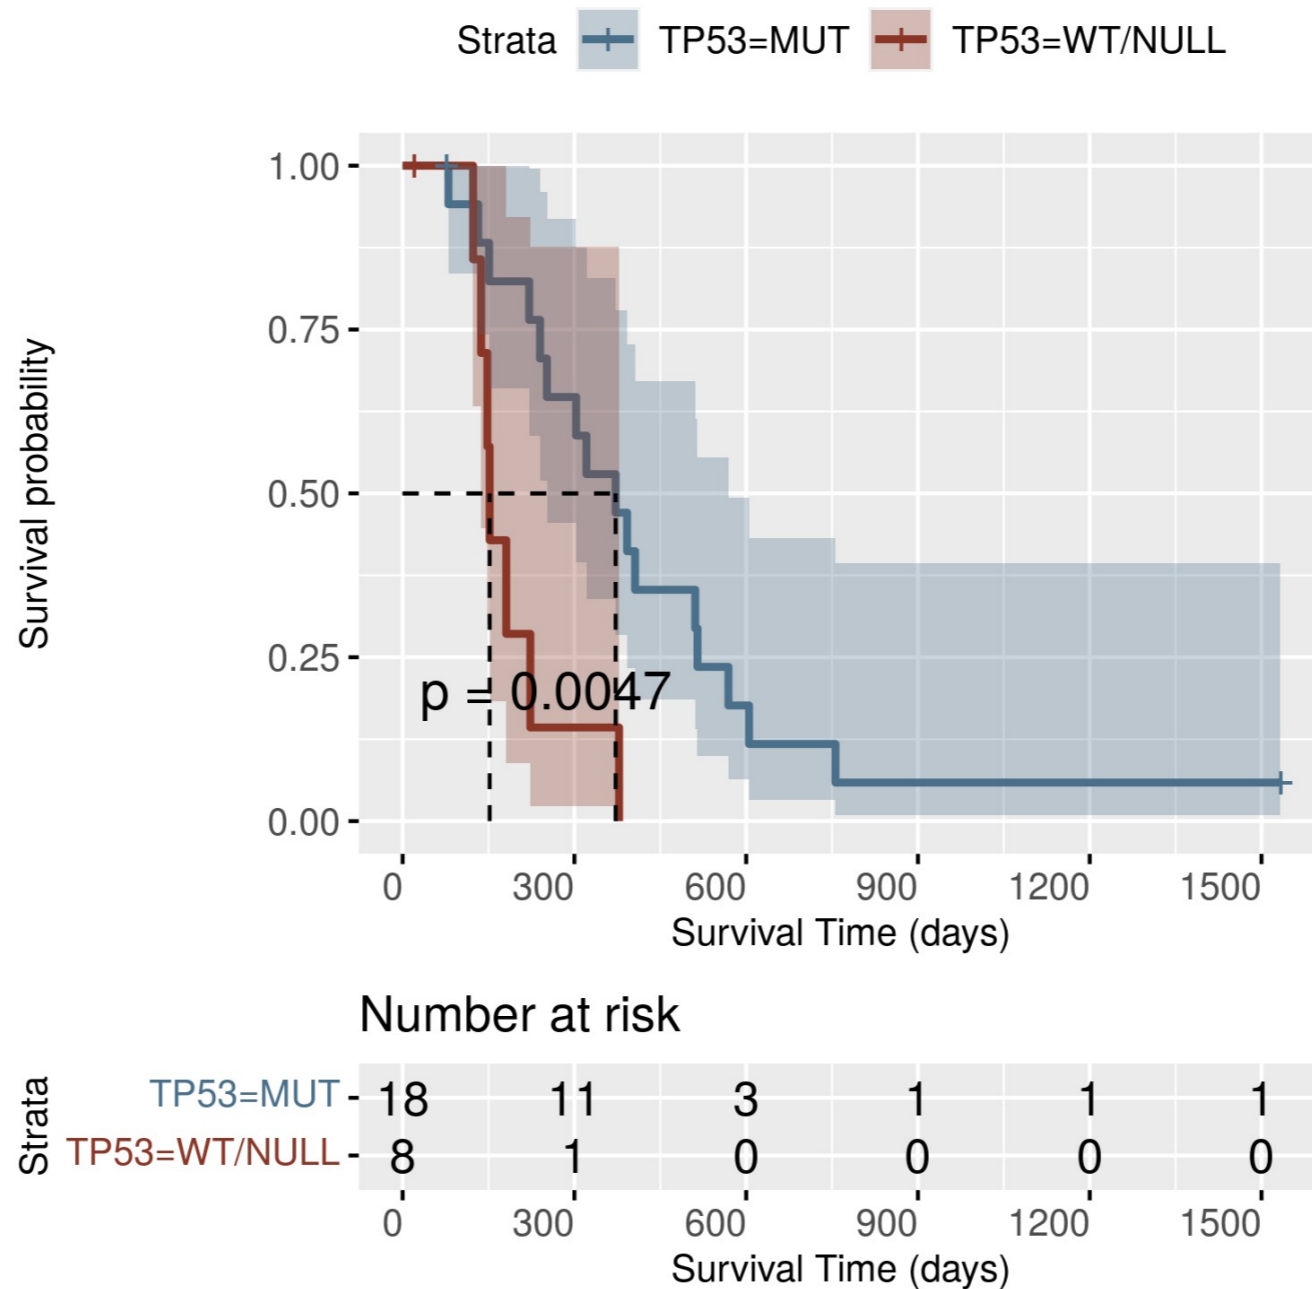

**Supplementary Figure 13.** Kaplan Meier plot using survival time. Stratification of patients were based on Wildtype/NULL and mutant *TP53* carrying missense variants. The time event analyzed here is survival time. Source data for this plot is included in the Supplementary Data 11.

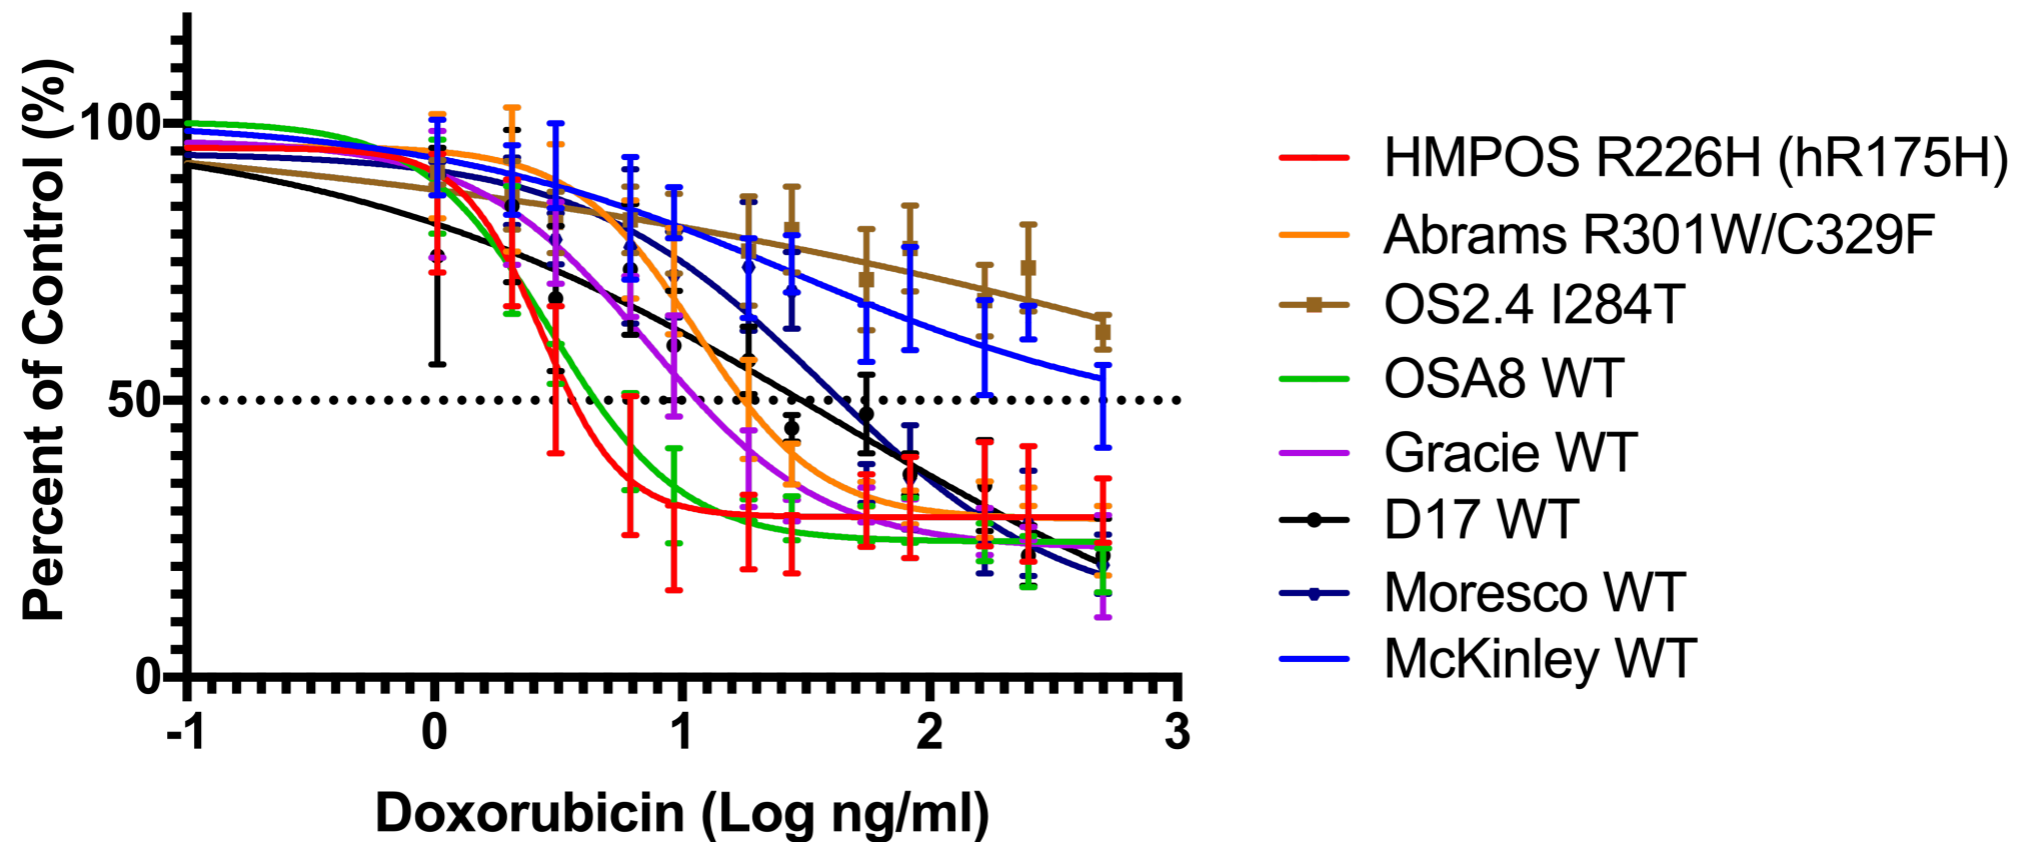

**Supplementary Figure 14.** Drug sensitivity assay of canine OSA cell lines to doxorubicin. Cells were plated on 96 well plates and treated with serial dilutions of doxorubicin 24 hours later. After treatment for 72 hours, cell viability was assessed with a resazurin-based fluorescent assay, normalized to time zero readings, and expressed as percent of control. Cell lines are annotated with identified *TP53* missense mutations. The HMPOS cell line bears an R226H variant homologous to the human R175H hotspot mutation and exhibits the greatest sensitivity to doxorubicin. The error bars are mean  $\pm$ SD (n=3 to 4 independent experiments). Source data for this plot is included in the Supplementary Data 11.

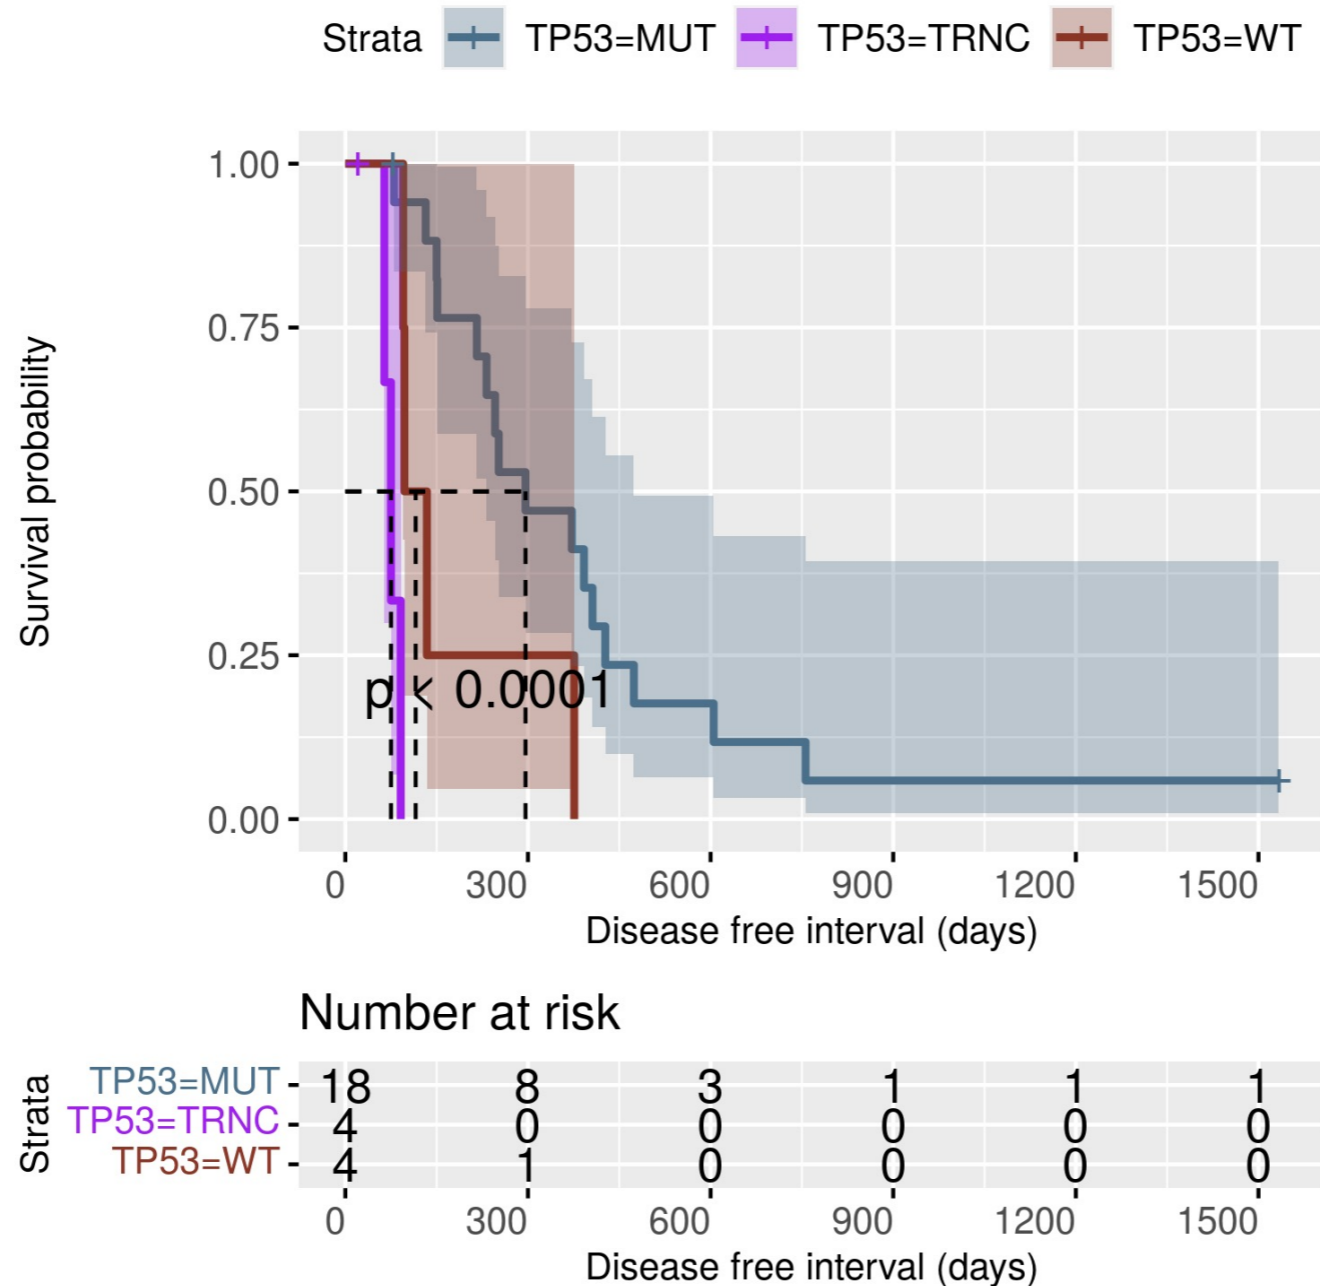

**Supplementary Figure 15.** Kaplan Meier plot using three types of TP53 mutation status. Stratification of patients were based on presence of either wildtype (WT), or truncation (TRNC) or missense (MUT) mutations within *TP53* gene. The time event analyzed here was disease free interval. Source data for this plot is included in the Supplementary Data 11.

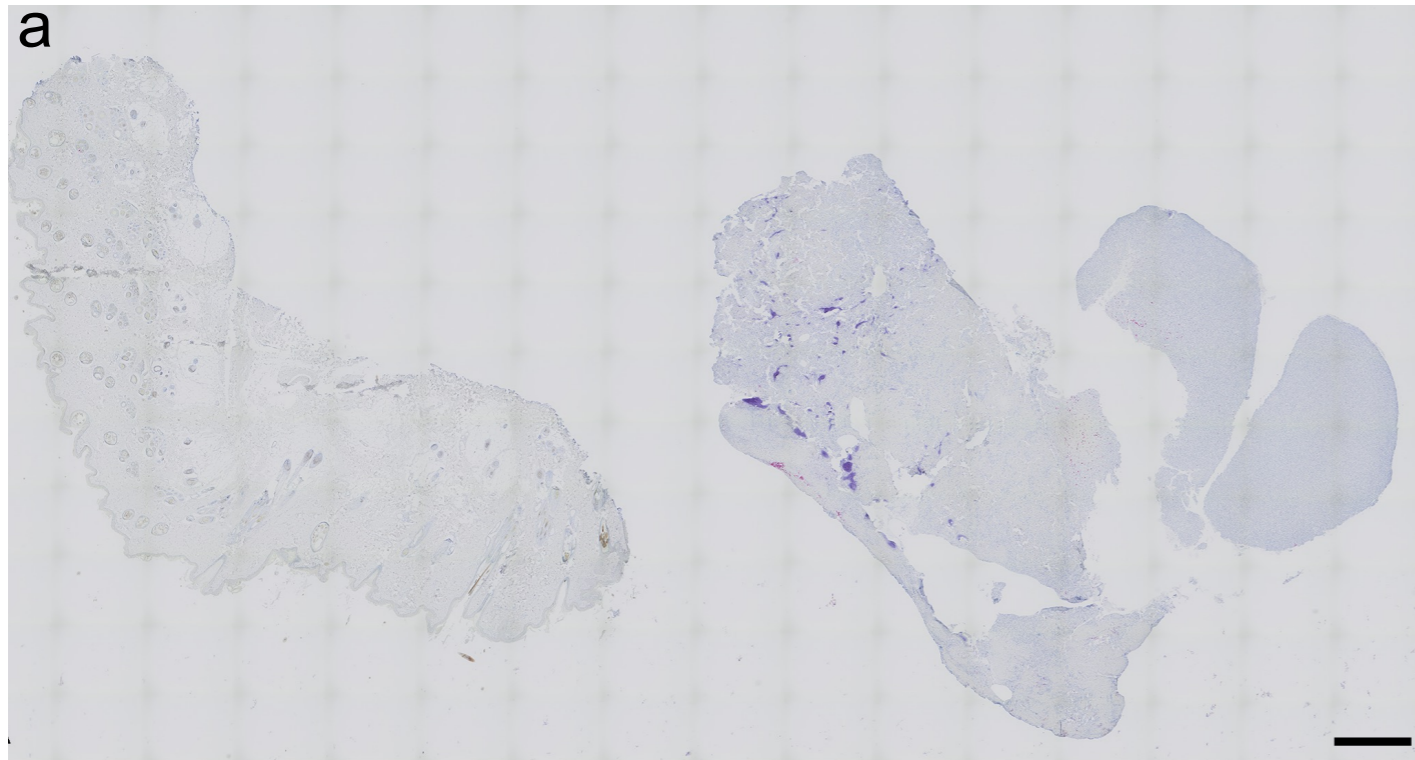

b

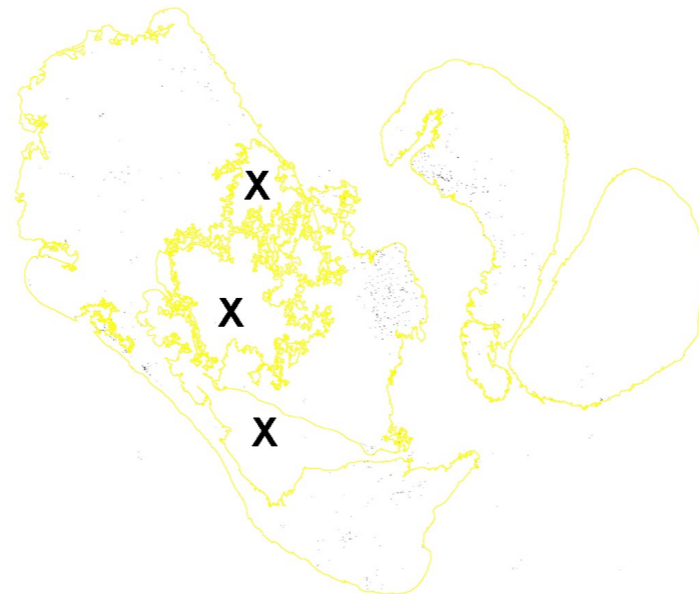

### Supplementary Figure 16.

Quantification of tumor area of interest. a. Parent 10x magnification whole-slide image of case 424 immunolabeled for CD3. Fast Red chromogen. Hematoxylin counterstain. Scale bars = 1 mm. b. ImageJ image analysis mask for case 424. The tumor area analyzed is outlined in yellow and CD3 positive cells are pseudo-colored black. Note the large section of normal haired skin removed from the analysis. X's denote regions of tumor containing abundant osteoid and which were excluded from the tumor area analysis.

## Supplementary References

- 1 MacEwen EG, Kutzke J, Carew J, Pastor J, Schmidt JA, Tsan R, et al. c-Met tyrosine kinase receptor expression and function in human and canine osteosarcoma cells. *Clin Exp Metastasis* 2003;20:421-30
- 2 Riggs JL, McAllister RM, Lennette EH. Immunofluorescent studies of RD-114 virus replication in cell culture. *J Gen Virol* 1974;25:21-9
- 3 O'Donoghue LE, Rivest JP, Duval DL. Polymerase chain reaction-based species verification and microsatellite analysis for canine cell line validation. *J Vet Diagn Invest* 2011;23:780-5
- 4 F. Barroga E, Kadosawa T, Okumura M, Fujinaga T. Establishment and Characterization of the Growth and Pulmonary Metastasis of a Highly Lung Metastasizing Cell Line from Canine Osteosarcoma in Nude Mice. *Journal of Veterinary Medical Science* 1999;61:361-7
- 5 Mealey KL, Barhoumi R, Rogers K, Kochevar DT. Doxorubicin induced expression of P-glycoprotein in a canine osteosarcoma cell line. *Cancer Lett* 1998;126:187-92
- 6 Thomas R, Wang HJ, Tsai PC, et al. Influence of genetic background on tumor karyotypes: evidence for breed-associated cytogenetic aberrations in canine appendicular osteosarcoma. *Chromosome Res.* 2009;17(3):365-377.

**Supplementary Note 1.** Javascript macro used for this analysis in ImageJ analysis. This script was used to measure the immunohistochemical sections to determine the percentage of tumor stained with antibodies. See associated Supplementary Figure 16 for more details.

```
1 folder = getDirectory("Choose a Folder with Images");
2 setBatchMode(true);
3 listFiles(folder);
4 setBatchMode(false);
5 showMessage("Macro Complete");
6 function listFiles(folder)
7 {
8     list = getFileList(folder);
9     for (i=0; i<list.length; i++)
10    {
11        //Do subfolders///
12        if (endsWith(list[i], "/"))
13        {
14            listFiles(""+folder+list[i]);
15        }
16        else if (endsWith(list[i], ".tif")&&matches(list[i],
17 ".*10x.*") || matches(list[i], ".*10X.*")) //
18        {
19            open(folder + list[i]);
20            image = File.nameWithoutExtension;
21            if (Overlay.size != 0 )
22            {
23                run("To ROI Manager"); // For Saved Overlays
24            }
25            process(image,list[i],'');
26            run("Close All");
27            run("Collect Garbage");
28        }
29    }
30 }
31 }
32 function process(image,pic, quad)
33 {
34     selectWindow(pic);
35     //run("Add to Manager");//Saved Selection
36
37     //run("Set Scale...", "distance=0.3125 known=1 pixel=1
38 unit=unit global");
39     run("Set Scale...", "distance=0.7812 known=1 pixel=1 unit=µm
40 global");
41     run("Colour Deconvolution", "vectors=[FastRed FastBlue DAB]
42 hide");
```

```

43
44     selectWindow(pic+"-(Colour_3)");
45         setThreshold(0, 135);
46         run("Analyze Particles...", "size=10-Infinity show=Masks");
47         rename("Melanin Mask");
48         run("Dilate");
49         selectWindow(pic+"-(Colour_3)");
50         close();
51         selectWindow(pic+"-(Colour_2)");
52         close();
53         selectWindow(pic+"-(Colour_1)");
54         //getRowStatistics(nPixels, mean, min, max, std);
55         setThreshold(0, 150);
56         run("Analyze Particles...", "size=10-Infinity show=Masks");
57         rename("CD3 Mask");
58         selectWindow(pic+"-(Colour_1)");
59         close();
60         imageCalculator("Subtract create", "CD3 Mask", "Melanin
61 Mask");
62         selectWindow("Melanin Mask");
63         close();
64         selectWindow("CD3 Mask");
65         close();
66         selectWindow("Result of CD3 Mask");
67         rename(image+', '+quad);
68
69
70         //fill selection here
71         if(roiManager("count") != 0)
72         {
73             setForegroundColor(255, 255, 255);//white
74             roiManager("fill");
75             //roiManager("Set Line Width", 2);
76             //roiManager("Draw");
77         }
78
79         run("Analyze Particles...", "pixel size=10-Infinity
80 show=Masks summarize");
81         rename("cd3");
82         selectWindow(image+', '+quad);
83         close();
84         selectWindow(pic);
85         run("Select None");
86         run("Duplicate...", "title=BW");
87         selectWindow("BW");
88         run("8-bit");
89         run("Find Edges");
90         //setAutoThreshold("MinError dark");

```



```

91     if(roiManager("count") != 0)
92     {
93         setForegroundColor(0, 0, 0); //black
94         roiManager("fill");
95     }
96     setThreshold(15,255);
97     run("Analyze Particles...", "pixel size=100-Infinity
98 show=Masks");
99     selectWindow("BW");
100    close();
101    selectWindow("Mask of BW");
102    run("Fill Holes");
103    if(roiManager("count") != 0)
104    {
105        setForegroundColor(255, 255, 255); //white
106        roiManager("fill");
107        roiManager("Set Line Width", 2);
108        roiManager("Draw");
109    }
110
111    if(roiManager("count") != 0)
112    {
113        roiManager("Delete");
114    }
115
116    run("Analyze Particles...", "pixel size=50000-Infinity
117 show=Masks add");
118    rename(image + " Tissue Mask,"+quad);
119    setThreshold(15,255);
120    run("Measure");
121    selectWindow("Mask of BW");
122    close();
123    selectWindow(image + " Tissue Mask,"+quad);
124    close();
125    selectWindow("cd3");
126    run("RGB Color");
127    setForegroundColor(255, 0, 0);
128    roiManager("Set Line Width", 5);
129    roiManager("Draw");
130    if(roiManager("count") != 0)
131    {
132
133        roiManager("Delete");
134    }
135    saveAs("Jpeg", folder+ image+" QC "+quad+".jpg");
136    close();
137 }

```
