# Supplementary material for: Immune pathways and TP53 missense mutations are associated with longer survival in canine osteosarcoma
Source: PubMed Central journal article supplement (PMC8505454; doi:10.1038/s42003-021-02683-0), 2021-10-11
Supplement: 42003_2021_2683_MOESM3_ESM.pdf [file 42003_2021_2683_MOESM3_ESM.pdf]

## Description of Additional Supplementary Files

**File name:** Supplementary Data 1-10

**Description:**

*Supplementary Data 1:* General description and sequencing statistics on normal and osteosarcoma samples used for whole exome sequencing study.

*Supplementary Data 2:* Clinical data on osteosarcoma canine patients.

*Supplementary Data 3:* List of protein coding variants across 26 osteosarcoma samples.

*Supplementary Data 4:* Functional annotation of the genes with somatic short variants.

*Supplementary Data 5:* The somatic short variants within TP53 coding sequence in canine osteosarcoma tumors and their corresponding human homologous variants that are oncogenic.

*Supplementary Data 6:* GISTIC2.0 annotated significantly amplified and deleted genes.

*Supplementary Data 7:* Functional annotation of the genes with copy number variations.

*Supplementary Data 8:* Significantly correlated genes between CNV amplitude and its expression levels.

*Supplementary Data 9:* Significantly enriched gene sets in tumors when compared to normal bone gene expression.

*Supplementary Data 10:* Significantly enriched gene sets in dogs with long disease-free interval when compared short disease-free interval.

**File name:** Supplementary Data 11.

**Description:** Excel file containing source data for: Fig. 1a, Fig. 1b, Fig. 1c, Fig. 1d, Fig. 4e-f, Fig. 5b, Fig. 5c, Fig. 6a-b, Supplementary Figure 1, Supplementary Figure 2 and 3, Supplementary Figure 4a, Supplementary Figure 4b, Supplementary Figure 7, Supplementary Figure 11, Supplementary Figure 13, Supplementary Figure 14, Supplementary Figure 15.
